# Supplementary material for: Optimum catalyst selection over continuous and discrete process variables with a single droplet microfluidic reaction platform
Source: Royal Society of Chemistry journal article supplement (doi:10.1039/c8re00032h), 2018-01-01
Supplement: c8re00032h1.xlsx [file c8re00032h1.xlsx]

## Sheet: MINLP 1 calibration
Data point	Catalyst	MINLP 1 #	Temperature (degC)	Reagent 3 Conc. (M)	Residence Time (s)	Product peak area (270 nm)	Internal standard peak area (300nm)	Peak ratio	MINLP 2 #	Temperature (degC)	Reagent 3 Conc. (M)	Residence Time (s)	Yield
1	P1L1 XPhos OMs	7	30	0.000842309	600	0	4024.65	0	-	-	-	-	0
2	P1L1 XPhos OMs	82	110	0.000842309	600	1658.01	3931.51	0.421725	11	110	0.000842309	519.616	0.45953
3	P2L1 XPhos Cl	65	82.6	0.00416045	600	2837.78	4621.12	0.614089	52	82	0.00416045	612.252	0.784935
4	P1L1 XPhos OMs	58	104.6	0.00416045	195.9	1619.92	2231.65	0.725885	40	103.5	0.00416045	234.677	0.806121
5	P1L1 XPhos OMs	88	77.6	0.00416045	600	2976.2	4285.9	0.694418	34	70	0.00416045	646.532	0.852753
6	P2L1 XPhos Cl	28	110	0.00416045	600	938.108	1390.12	0.674838	25	110	0.00416045	573.935	0.854755
Pivoted table
Data point	1	2	3	4	5	6
Catalyst	P1L1 XPhos OMs	P1L1 XPhos OMs	P2L1 XPhos Cl	P1L1 XPhos OMs	P1L1 XPhos OMs	P2L1 XPhos Cl
MINLP 1 Experiment #	7	82	65	58	88	28
Temperature (degC)	30	110	82.6	104.6	77.6	110
Reagent 3 Conc. (M)	0.000842309	0.000842309	0.00416045	0.00416045	0.00416045	0.00416045
Residence Time (s)	600	600	600	195.9	600	600
Product peak area (270 nm)	0	1658.01	2837.78	1619.92	2976.2	938.108
Internal standard peak area (300nm)	4024.65	3931.51	4621.12	2231.65	4285.9	1390.12
Peak ratio	0	0.421725	0.614089	0.725885	0.694418	0.674838
MINLP 2 Experiment #	-	44	63	48	46	25
Temperature (degC)	-	110	82	103.5	70	110
Reagent 3 Conc. (M)	-	0.000842309	0.00416045	0.00416045	0.00416045	0.00416045
Residence Time (s)	-	519.616	612.252	234.677	646.532	573.935
Yield	0	0.45953	0.784935	0.806121	0.852753	0.854755
Correlation
Peak ratio	Yield	Predicted yield	Difference
0	0	0	0
0.421725	0.45953	0.507441	-0.047911
0.614089	0.784935	0.738905	0.0460308
0.725885	0.806121	0.873423	-0.0673021
0.694418	0.852753	0.83556	0.0171935
0.674838	0.854755	0.812	0.0427545
Slope	1.20325
Maximum Single standard deviation of model prediction for experimental data from optimization (Matlab)
Yield	TON
0.06	8

## Sheet: MINLP 2 calibration
Date	Method	CWC_Suzukiv7.0.M
	Injection volume in µL	0.1			38.4774
Sample set									Ratio
Sample #	Sample name	Injection	Actual analyt concentration in mol/l	Actual internal standard concentration in g/l	Actual analyt concentration in M / actucal internal standard concentration in g / L	Product (285 nm)	Naphthalene(228)	Analyt peak area / Internal standard peak area	Average	Standard deviation	Relative standard deviation
	2017-09-05 1	1	0.0350997	4.67587	0.00750657	972.61	732.975	1.32693	1.30106	0.0415189	0.0319115
	2017-09-05 1	2	0.0350997	4.67587	0.00750657	927.938	740.472	1.25317
	2017-09-05 1	3	0.0350997	4.67587	0.00750657	930.25	703.094	1.32308
	2017-09-05 2	1	0.0704252	4.67587	0.0150614	1657.85	622.904	2.66149	2.65662	0.0330013	0.0124223
	2017-09-05 2	2	0.0704252	4.67587	0.0150614	1857.48	708.568	2.62145
	2017-09-05 2	3	0.0704252	4.67587	0.0150614	1855.07	690.409	2.68691
	2017-09-05 3	1	0.103682	4.67587	0.0221739	2732.15	689.606	3.9619	3.99772	0.0515249	0.0128886
	2017-09-05 3	2	0.103682	4.67587	0.0221739	2893.14	713.163	4.05677
	2017-09-05 3	3	0.103682	4.67587	0.0221739	2792.98	702.728	3.97448
	2017-09-05 4	1	0.137626	4.67587	0.0294332	3796.21	727.471	5.21837	5.23035	0.158296	0.0302649
	2017-09-05 4	2	0.137626	4.67587	0.0294332	3691.28	726.86	5.07839
	2017-09-05 4	3	0.137626	4.67587	0.0294332	4072.98	755.052	5.3943
	2017-09-05 5	1	0.168431	4.67587	0.0360214	5196.23	793.478	6.54868	6.51653	0.0278526	0.00427415
	2017-09-05 5	2	0.168431	4.67587	0.0360214	4672.52	718.745	6.50094
	2017-09-05 5	3	0.168431	4.67587	0.0360214	5029.98	773.848	6.49995
Slope in (Analyt peak area / Internal standard peak area) / (Analyt concentration in M/ Internal standard amount in g/L) Unit = L*M*/(g)	179.365
Calibration parameter	0.00557523

## Sheet: MINLP 2 standard preparation
		Minimum concentration in mol/l	Maximum concentation in mol/l	Number of standards	Density in g/ml	Molar mass in g/mol
Solvent	THF
Analyt	2-fluoro-3,3'-bipyridine	0	0.167	4		174.18
Internal standard	Naphthalene	4.9				128.171
		*ISTD: in g/L
Standard levels
#
Standard number	1	2	3	4	5	6
Yield percentage	0.2	0.4	0.6	0.8	1	1.2
Target analyt concentration in mol/l	0.0334	0.0668	0.1002	0.1336	0.167	0.2004
Target internal standard concentration in g/l	4.9	4.9	4.9	4.9	4.9	4.9
Concentration ratio in M * L /g	0.00681633	0.0136327	0.020449	0.0272653	0.0340816	0.040898
Makeup solution
Measuring flask volume in ml	5	Naphthalene, analytical standard 99.7% purity
Target internal standard mass in g	0.049
1. Flask mass in g	12.4434
1. Flask mass in g	12.4435
1. Flask mass in g	12.4435
Average flask mass in g	12.4435
Standard deviation flask mass in g	1.39523e-05	1.12126e-06
1. Actual internal standard mass + flask in g	12.4902
2. Actual internal standard mass + flask in g	12.4902
3. Actual internal standard mass + flask in g	12.4902
Average Actual internal standard mass + flask in g	12.4902
Std Actual internal standard mass + flask in g	2.85463e-05
Average internal standard mass in g	0.0467587
Std internal standard mass in g	1.4594e-05	0.000312112
Fill measuring flask with THF
Dilute THF 1:1 with 50%Acetone:50%H2O
Volumetric flask error in ml	0.02
Actual internal standard concentration in g/L	4.67587
Error internal standard concentration in g/L	0.0187087	0.00400112
Mixing of standards	1	2	3	4	5	6
Measuring flask volume in ml	2	1	1	1	1	1
Volumetric error in ml	0.015	0.01	0.01	0.01	0.01	0.01
Re. error	0.0075	0.01	0.01	0.01	0.01	0.01
Target analyt mass in g	0.0116352	0.0116352	0.0174528	0.0232704	0.0290881	0.0349057
1. Flask mass in g	8.94895	6.71523	6.71527	6.71531	6.71527	6.71532
1. Flask mass in g	8.94893	6.71524	6.71529	6.71533	6.71525	6.71532
1. Flask mass in g	8.94893	6.71526	6.7153	6.71532	6.71526	6.71533
Average in g	8.94894	6.71525	6.71529	6.71532	6.71526	6.71532
Std in g	6.84755e-06	1.11156e-05	1.02089e-05	9.17727e-06	5.55778e-06	5.4365e-06
Rel. std	7.6518e-07	1.65527e-06	1.52025e-06	1.36662e-06	8.27634e-07	8.09567e-07
1. Actual analyt mass in g	8.96117	6.72751	6.73332	6.73926	6.74454	6.75027
2. Actual analyt mass in g	8.96117	6.72751	6.73337	6.7393	6.74462	6.75032
3. Actual analyt mass in g	8.96116	6.72752	6.73334	6.73931	6.74464	6.7503
Average in g	8.96117	6.72751	6.73335	6.73929	6.7446	6.7503
Std in g	1.88562e-06	3.39935e-06	1.98718e-05	2.4074e-05	3.9047e-05	2.13125e-05
Difference in g	0.0122273	0.0122667	0.0180593	0.0239717	0.0293373	0.034977
Std in g	4.96193e-06	7.71621e-06	9.66288e-06	1.48967e-05	3.34892e-05	1.5876e-05
Rel. std	0.000405806	0.000629039	0.000535063	0.000621429	0.00114152	0.000453898
Resulting standards
Actual analyt concentration in mol/l	0.0350997	0.0704252	0.103682	0.137626	0.168431	0.20081
Std in mol/l	0.000277491	0.000396426	0.000573886	0.000773654	0.00103442	0.00109519
Rel. std	0.00790581	0.00562904	0.00553506	0.00562143	0.00614152	0.0054539
Actual internal standard concentration in g/l	4.67587	4.67587	4.67587	4.67587	4.67587	4.67587
Std in mol/l	0.0187087	0.0187087	0.0187087	0.0187087	0.0187087	0.0187087
Actual analyt concentration / Actual internal standard concentration	0.00750657	0.0150614	0.0221739	0.0294332	0.0360214	0.0429459
Concentration ratio	0.00750657	0.0150614	0.0221739	0.0294332	0.0360214	0.0429459
Std	8.93801e-05	0.000145044	0.000211454	0.000283223	0.000365352	0.000406055
Rel. std	0.0119069	0.00963016	0.00953618	0.00962255	0.0101426	0.00945502
