# Supplementary material for: Optimum catalyst selection over continuous and discrete process variables with a single droplet microfluidic reaction platform
Source: Royal Society of Chemistry journal article supplement (doi:10.1039/c8re00032h), 2018-01-01
Supplement: c8re00032h2.xlsx [file c8re00032h2.xlsx]

## Sheet: MINLP1 optimization
Number	Reagent 1 ID	Reagent 1 Conc. (M)	Reagent 2 ID	Reagent 2 Conc. (M)	Reagent 3 ID	Reagent 3 Conc. (M)	Reagent 4 ID	Reagent 4 Conc. (M)	Make-Up Solvent ID	Inlet Injection (µL)	Outlet Injection (µL)	Temperature (°C)	Residence Time Actual (s)	DBU Conc (M)	Internal Standard Conc. (g/L)	Reaction Yield	Objective Function Value	Naphthalene Retention time in min	3-Chloropyridine Retention time in min	2-Fluoro-3,3'-bipyridine Retention time in min	Naphthalene Peak area in a.u. at 270 nm	3-Chloropyridine Peak area in a.u. at 270 nm	2-Fluoro-3,3'-bipyridine Peak area in a.u. at 300 nm	TON	Reagent 3 Conc in mol%	Predicted Yield Std	Predicted TON Std
1	3-Chloropyridine	0.166355	2-Fluoropyridine-3-boronic acid pincacol ester	0.251325	P1L3 RuPhos OMs	0.00419553	Water	9.2494	Tetrahydrofuran	3.51291	18.5129	30	600	0.333	7.36536	1e-06	1e-06	4.37784	3.4678	0	2698.28	4007.15	0	1	0.0252203	0	0
2	3-Chloropyridine	0.166356	2-Fluoropyridine-3-boronic acid pincacol ester	0.251326	P1L2 SPhos OMs	0.00418039	Water	9.24943	Tetrahydrofuran	3.51291	18.5129	30	60	0.333	7.36539	1e-06	1e-06	4.35257	3.47287	0	1054.68	1394.77	0	1	0.0251292	0	0
3	3-Chloropyridine	0.166364	2-Fluoropyridine-3-boronic acid pincacol ester	0.251338	P1L6 PPh3 OMs	0.000852086	Water	9.2499	Tetrahydrofuran	3.51291	18.5129	30	600	0.333	7.36576	1e-06	1e-06	4.34145	3.46877	0	1090.27	1594.12	0	1	0.00512181	0	0
4	3-Chloropyridine	0.166356	2-Fluoropyridine-3-boronic acid pincacol ester	0.251325	P1L7 PtBu3 OMs	0.00418178	Water	9.24942	Tetrahydrofuran	3.51291	18.5129	30	600	0.333	7.36538	1e-06	1e-06	4.35476	3.47734	0	2732.29	4189.98	0	1	0.0251376	0	0
5	3-Chloropyridine	0.166364	2-Fluoropyridine-3-boronic acid pincacol ester	0.251338	P1L4 XantPhos OMs	0.000839434	Water	9.2499	Tetrahydrofuran	3.51291	18.5129	30	60	0.333	7.36577	1e-06	1e-06	4.36803	3.47483	0	3461.31	4918.36	0	1	0.00504576	0	0
6	3-Chloropyridine	0.166356	2-Fluoropyridine-3-boronic acid pincacol ester	0.251326	P1L5 PCy3 OMs	0.00419088	Water	9.24944	Tetrahydrofuran	3.51291	18.5129	30	60	0.333	7.3654	1e-06	1e-06	4.37033	3.47058	0	2149.05	3151.01	0	1	0.0251922	0	0
7	3-Chloropyridine	0.166364	2-Fluoropyridine-3-boronic acid pincacol ester	0.251338	P1L1 XPhos OMs	0.000842309	Water	9.2499	Tetrahydrofuran	3.51291	18.5129	30	600	0.333	7.36576	1e-06	1e-06	4.36535	3.46812	0	4024.65	5622.94	0	1	0.00506304	0	0
8	3-Chloropyridine	0.166364	2-Fluoropyridine-3-boronic acid pincacol ester	0.251338	P2L1 XPhos Cl	0.000849115	Water	9.2499	Tetrahydrofuran	3.51291	18.5129	30	60	0.333	7.36577	1e-06	1e-06	4.34028	3.47131	0	2947.94	4178.31	0	1	0.00510395	0	0
9	3-Chloropyridine	0.166355	2-Fluoropyridine-3-boronic acid pincacol ester	0.251325	P1L1 XPhos OMs	0.00417121	Water	9.24941	Tetrahydrofuran	3.51291	18.5129	110	60	0.333	7.36537	0.806961	3.47171	4.36581	3.54518	3.09851	2945.25	164.341	2036.07	32.1917	0.0250741	0.057377	2.28891
10	3-Chloropyridine	0.166364	2-Fluoropyridine-3-boronic acid pincacol ester	0.251338	P1L7 PtBu3 OMs	0.00082	Water	9.2499	Tetrahydrofuran	3.51291	18.5129	110	60	0.333	7.36577	1e-06	1e-06	4.36577	3.4718	0	3871.82	5244.61	0	1	0.00492894	0	0
11	3-Chloropyridine	0.166356	2-Fluoropyridine-3-boronic acid pincacol ester	0.251326	P2L1 XPhos Cl	0.00416045	Water	9.24944	Tetrahydrofuran	3.51291	18.5129	110	600	0.333	7.3654	0.752373	3.40425	4.35771	3.65906	3.11149	3376.2	183.164	2176.1	30.0917	0.0250093	0.0534956	2.13959
12	3-Chloropyridine	0.166364	2-Fluoropyridine-3-boronic acid pincacol ester	0.251338	P1L3 RuPhos OMs	0.000839152	Water	9.2499	Tetrahydrofuran	3.51291	18.5129	110	60	0.333	7.36576	0.431058	4.44825	4.34002	3.47233	3.08401	4149.06	2876.27	1532.16	85.4769	0.00504406	0.0306493	6.07762
13	3-Chloropyridine	0.166364	2-Fluoropyridine-3-boronic acid pincacol ester	0.251338	P1L5 PCy3 OMs	0.000855325	Water	9.2499	Tetrahydrofuran	3.51291	18.5129	110	600	0.333	7.36577	0.168453	3.48957	4.34197	3.47198	3.09292	2851.4	3396.71	411.485	32.7719	0.00514127	0.0119774	2.33016
14	3-Chloropyridine	0.166355	2-Fluoropyridine-3-boronic acid pincacol ester	0.251325	P1L6 PPh3 OMs	0.00417906	Water	9.24941	Tetrahydrofuran	3.51291	18.5129	110	60	0.333	7.36537	0.0156153	-0.475197	4.34784	3.47647	3.09578	3473.04	5152.41	46.4598	0.621763	0.0251213	0.00111029	0.0442089
15	3-Chloropyridine	0.166356	2-Fluoropyridine-3-boronic acid pincacol ester	0.251326	P1L4 XantPhos OMs	0.00419696	Water	9.24943	Tetrahydrofuran	3.51291	18.5129	110	600	0.333	7.36539	0.112422	1.49454	4.34125	3.48058	3.10051	3683.22	4627.62	354.728	4.45727	0.0252288	0.00799346	0.316923
16	3-Chloropyridine	0.166364	2-Fluoropyridine-3-boronic acid pincacol ester	0.251338	P1L2 SPhos OMs	0.000836121	Water	9.2499	Tetrahydrofuran	3.51291	18.5129	110	600	0.333	7.36577	0.126179	3.22332	4.34934	3.47691	3.09553	3110.89	3691.66	336.271	25.1114	0.00502585	0.00897164	1.78548
17	3-Chloropyridine	0.166361	2-Fluoropyridine-3-boronic acid pincacol ester	0.251334	P1L1 XPhos OMs	0.00188514	Water	9.24974	Tetrahydrofuran	3.51291	18.5129	65.3	600	0.333	7.36564	0.276201	3.19377	4.35932	3.47033	3.09432	3217.66	3545.74	761.349	24.3801	0.0113316	0.0196386	1.73349
18	3-Chloropyridine	0.166356	2-Fluoropyridine-3-boronic acid pincacol ester	0.251325	P1L7 PtBu3 OMs	0.00418178	Water	9.24942	Tetrahydrofuran	3.51291	18.5129	65.3	600	0.333	7.36538	1e-06	1e-06	4.33985	3.47848	0	3680.14	5631.78	0	1	0.0251376	0	0
19	3-Chloropyridine	0.166356	2-Fluoropyridine-3-boronic acid pincacol ester	0.251326	P1L5 PCy3 OMs	0.00419088	Water	9.24944	Tetrahydrofuran	3.51291	18.5129	65.3	189.7	0.333	7.3654	1e-06	1e-06	4.35504	3.47485	0	4261.24	5785.89	0	1	0.0251922	0	0
20	3-Chloropyridine	0.166362	2-Fluoropyridine-3-boronic acid pincacol ester	0.251334	P1L4 XantPhos OMs	0.0018887	Water	9.24976	Tetrahydrofuran	3.51291	18.5129	65.3	189.7	0.333	7.36565	1e-06	1e-06	4.36332	3.47258	0	4339.55	5855.44	0	1	0.011353	0	0
21	3-Chloropyridine	0.166362	2-Fluoropyridine-3-boronic acid pincacol ester	0.251335	P2L1 XPhos Cl	0.00186802	Water	9.24976	Tetrahydrofuran	3.51291	18.5129	65.3	189.7	0.333	7.36565	0.481982	3.75966	4.33731	3.47475	3.09365	2532.68	1987.29	1045.75	42.934	0.0112287	0.0342701	3.05272
22	3-Chloropyridine	0.166362	2-Fluoropyridine-3-boronic acid pincacol ester	0.251334	P1L6 PPh3 OMs	0.00186644	Water	9.24975	Tetrahydrofuran	3.51291	18.5129	65.3	189.7	0.333	7.36564	1e-06	1e-06	4.33786	3.47951	0	4358.59	5926.13	0	1	0.0112192	0	0
23	3-Chloropyridine	0.166362	2-Fluoropyridine-3-boronic acid pincacol ester	0.251334	P1L2 SPhos OMs	0.00188124	Water	9.24976	Tetrahydrofuran	3.51291	18.5129	65.3	600	0.333	7.36565	0.0790832	1.94521	4.34632	3.47003	3.084	4025.89	4834.07	272.749	6.99508	0.0113082	0.00562301	0.497368
24	3-Chloropyridine	0.166355	2-Fluoropyridine-3-boronic acid pincacol ester	0.251325	P1L3 RuPhos OMs	0.00419553	Water	9.2494	Tetrahydrofuran	3.51291	18.5129	65.3	600	0.333	7.36536	0.39102	2.74138	4.34396	3.47087	3.08959	4031.82	3422.25	1350.57	15.5084	0.0252203	0.0278025	1.10268
25	3-Chloropyridine	0.166362	2-Fluoropyridine-3-boronic acid pincacol ester	0.251334	P1L7 PtBu3 OMs	0.00188597	Water	9.24975	Tetrahydrofuran	3.51291	18.5129	110	189.7	0.333	7.36564	0.039518	1.24895	4.35733	3.47347	3.07506	3821.41	5282.54	129.371	3.48669	0.0113366	0.00280983	0.247913
26	3-Chloropyridine	0.166361	2-Fluoropyridine-3-boronic acid pincacol ester	0.251334	P1L3 RuPhos OMs	0.00187807	Water	9.24974	Tetrahydrofuran	3.51291	18.5129	110	189.7	0.333	7.36564	0.570695	3.92325	4.34672	3.467	3.09125	4192.03	1831.37	2049.49	50.5645	0.0112891	0.0405778	3.59526
27	3-Chloropyridine	0.166362	2-Fluoropyridine-3-boronic acid pincacol ester	0.251335	P1L5 PCy3 OMs	0.00188169	Water	9.24976	Tetrahydrofuran	3.51291	18.5129	110	600	0.333	7.36565	0.35393	3.44357	4.33473	3.47211	3.09081	2184.72	2270.88	662.414	31.2985	0.0113108	0.0251653	2.2254
28	3-Chloropyridine	0.166356	2-Fluoropyridine-3-boronic acid pincacol ester	0.251326	P2L1 XPhos Cl	0.00416045	Water	9.24944	Tetrahydrofuran	3.51291	18.5129	110	600	0.333	7.3654	0.787738	3.45018	4.34449	3.65684	3.08996	1390.12	281.726	938.108	31.5061	0.0250093	0.0560101	2.24016
29	3-Chloropyridine	0.166356	2-Fluoropyridine-3-boronic acid pincacol ester	0.251326	P1L4 XantPhos OMs	0.00419696	Water	9.24943	Tetrahydrofuran	3.51291	18.5129	110	600	0.333	7.36539	0.186791	2.00227	4.33132	3.47886	3.08928	3845.02	4194.28	615.28	7.40587	0.0252288	0.0132813	0.526576
30	3-Chloropyridine	0.166356	2-Fluoropyridine-3-boronic acid pincacol ester	0.251326	P1L2 SPhos OMs	0.00418039	Water	9.24943	Tetrahydrofuran	3.51291	18.5129	110	189.7	0.333	7.36539	0.641693	3.24034	4.33511	3.74773	3.10703	4058.02	1238.99	2230.79	25.5425	0.0251292	0.045626	1.81614
31	3-Chloropyridine	0.166355	2-Fluoropyridine-3-boronic acid pincacol ester	0.251325	P1L6 PPh3 OMs	0.00417906	Water	9.24941	Tetrahydrofuran	3.51291	18.5129	110	600	0.333	7.36537	0.0366403	0.377703	4.33911	3.48212	3.09887	3817.64	5066.41	119.832	1.45893	0.0251213	0.00260522	0.103734
32	3-Chloropyridine	0.166355	2-Fluoropyridine-3-boronic acid pincacol ester	0.251325	P1L1 XPhos OMs	0.00417121	Water	9.24941	Tetrahydrofuran	3.51291	18.5129	110	189.7	0.333	7.36537	0.787786	3.44766	4.334	3.556	3.10795	4064.37	200.196	2742.96	31.4267	0.0250741	0.0560136	2.23452
33	3-Chloropyridine	0.166356	2-Fluoropyridine-3-boronic acid pincacol ester	0.251326	P1L2 SPhos OMs	0.00418039	Water	9.24943	Tetrahydrofuran	3.51291	18.5129	110	600	0.333	7.36539	0.676507	3.29318	4.36296	3.73905	3.09537	3834.38	1607.47	2222.21	26.9283	0.0251292	0.0481014	1.91467
34	3-Chloropyridine	0.166356	2-Fluoropyridine-3-boronic acid pincacol ester	0.251325	P1L7 PtBu3 OMs	0.00418178	Water	9.24942	Tetrahydrofuran	3.51291	18.5129	110	600	0.333	7.36538	0.497704	2.98591	4.33802	3.47349	3.10149	3998.23	2469.97	1704.73	19.8045	0.0251376	0.035388	1.40815
35	3-Chloropyridine	0.166356	2-Fluoropyridine-3-boronic acid pincacol ester	0.251326	P1L5 PCy3 OMs	0.00419088	Water	9.24944	Tetrahydrofuran	3.51291	18.5129	110	600	0.333	7.3654	0.420719	2.81569	4.33876	3.47428	3.09646	3981.42	2932.66	1434.98	16.7048	0.0251922	0.0299142	1.18775
36	3-Chloropyridine	0.166355	2-Fluoropyridine-3-boronic acid pincacol ester	0.251325	P1L3 RuPhos OMs	0.00419553	Water	9.2494	Tetrahydrofuran	3.51291	18.5129	110	600	0.333	7.36536	0.772512	3.42227	4.33813	3.66231	3.10886	4053.07	321.902	2682.29	30.6388	0.0252203	0.0549275	2.17849
37	3-Chloropyridine	0.166356	2-Fluoropyridine-3-boronic acid pincacol ester	0.251326	P1L4 XantPhos OMs	0.00419696	Water	9.24943	Tetrahydrofuran	3.51291	18.5129	30	600	0.333	7.36539	1e-06	1e-06	4.3362	3.48107	0	3455.26	5127.06	0	1	0.0252288	0	0
38	3-Chloropyridine	0.166355	2-Fluoropyridine-3-boronic acid pincacol ester	0.251325	P1L1 XPhos OMs	0.00417121	Water	9.24941	Tetrahydrofuran	3.51291	18.5129	30	600	0.333	7.36537	0.0326193	0.263335	4.34307	3.4761	3.09916	4247.92	5867.75	118.705	1.30126	0.0250741	0.00231931	0.092523
39	3-Chloropyridine	0.166355	2-Fluoropyridine-3-boronic acid pincacol ester	0.251325	P1L6 PPh3 OMs	0.00417906	Water	9.24941	Tetrahydrofuran	3.51291	18.5129	30	600	0.333	7.36537	1e-06	1e-06	4.33396	3.47593	0	4244.97	6104.97	0	1	0.0251213	0	0
40	3-Chloropyridine	0.166356	2-Fluoropyridine-3-boronic acid pincacol ester	0.251326	P2L1 XPhos Cl	0.00416045	Water	9.24944	Tetrahydrofuran	3.51291	18.5129	30	600	0.333	7.3654	0.0418964	0.516215	4.34582	3.47455	3.10266	1959.52	2917.37	70.3307	1.67567	0.0250093	0.00297894	0.119145
41	3-Chloropyridine	0.166356	2-Fluoropyridine-3-boronic acid pincacol ester	0.251326	P1L2 SPhos OMs	0.00401319	Water	9.24945	Tetrahydrofuran	3.51291	18.5129	110	60	0.333	7.36541	0.706083	3.37679	4.34668	3.73648	3.09949	4410.34	1343.22	2667.75	29.2765	0.0241241	0.0502043	2.08164
42	3-Chloropyridine	0.166356	2-Fluoropyridine-3-boronic acid pincacol ester	0.251326	P1L5 PCy3 OMs	0.00414812	Water	9.24945	Tetrahydrofuran	3.51291	18.5129	110	60	0.333	7.3654	0.416936	2.81692	4.3357	3.47396	3.09131	4367.58	3567.71	1560.01	16.7252	0.0249352	0.0296452	1.1892
43	3-Chloropyridine	0.166356	2-Fluoropyridine-3-boronic acid pincacol ester	0.251325	P1L7 PtBu3 OMs	0.00418178	Water	9.24942	Tetrahydrofuran	3.51291	18.5129	110	60	0.333	7.36538	0.330035	2.5751	4.34211	3.47312	3.08733	4837.45	4569.94	1367.71	13.1326	0.0251376	0.0234663	0.933764
44	3-Chloropyridine	0.166355	2-Fluoropyridine-3-boronic acid pincacol ester	0.251325	P1L3 RuPhos OMs	0.00419553	Water	9.2494	Tetrahydrofuran	3.51291	18.5129	99.5	60	0.333	7.36536	0.743107	3.38346	4.34923	3.54561	3.10307	4973.15	274.763	3165.92	29.4726	0.0252203	0.0528368	2.09557
45	3-Chloropyridine	0.166355	2-Fluoropyridine-3-boronic acid pincacol ester	0.253674	P1L1 XPhos OMs	0.00417121	Water	9.2494	Tetrahydrofuran	3.51291	18.5129	77.8	60	0.333	7.36536	0.482698	2.95782	4.33967	3.46186	3.09698	3450.39	2259.8	1426.79	19.256	0.0250741	0.0343211	1.36915
46	3-Chloropyridine	0.166356	2-Fluoropyridine-3-boronic acid pincacol ester	0.251326	P2L1 XPhos Cl	0.00416045	Water	9.24944	Tetrahydrofuran	3.51291	18.5129	81.4	60	0.333	7.3654	0.829134	3.5014	4.35167	3.66241	3.13717	2559.57	245.192	1818.06	33.1617	0.0250093	0.0589535	2.35788
47	3-Chloropyridine	0.166362	2-Fluoropyridine-3-boronic acid pincacol ester	0.251334	P1L5 PCy3 OMs	0.00192445	Water	9.24976	Tetrahydrofuran	3.51291	18.5129	110	60	0.333	7.36565	0.0574055	1.60214	4.36467	3.47095	3.08456	4115.69	5417.17	202.401	4.96364	0.0115679	0.00408167	0.352927
48	3-Chloropyridine	0.166362	2-Fluoropyridine-3-boronic acid pincacol ester	0.251334	P1L2 SPhos OMs	0.00192305	Water	9.24975	Tetrahydrofuran	3.51291	18.5129	110	60	0.333	7.36564	0.45635	3.67599	4.35298	3.4714	3.09702	4740.35	2645.57	1853.22	39.4877	0.0115594	0.0324476	2.80767
49	3-Chloropyridine	0.166362	2-Fluoropyridine-3-boronic acid pincacol ester	0.251335	P1L1 XPhos OMs	0.0016846	Water	9.24977	Tetrahydrofuran	3.51291	18.5129	110	60	0.333	7.36566	0.643197	4.15156	4.34927	3.47003	3.09992	4346.72	1393.16	2395.1	63.5333	0.0101261	0.0457329	4.51738
50	3-Chloropyridine	0.16636	2-Fluoropyridine-3-boronic acid pincacol ester	0.251333	P1L3 RuPhos OMs	0.00223769	Water	9.24969	Tetrahydrofuran	3.51291	18.5129	110	60	0.333	7.3656	0.66497	3.90094	4.34672	3.46616	3.10211	4767.58	1303.96	2715.92	49.4488	0.0134508	0.047281	3.51593
51	3-Chloropyridine	0.166362	2-Fluoropyridine-3-boronic acid pincacol ester	0.251335	P2L1 XPhos Cl	0.00174066	Water	9.24978	Tetrahydrofuran	3.51291	18.5129	109.7	60	0.333	7.36567	0.616426	4.07631	4.35188	3.46914	3.09614	4367.09	1640.52	2306.17	58.9278	0.0104631	0.0438295	4.18991
52	3-Chloropyridine	0.166355	2-Fluoropyridine-3-boronic acid pincacol ester	0.251325	P1L1 XPhos OMs	0.00417121	Water	9.24941	Tetrahydrofuran	3.51291	18.5129	81.2	479.5	0.333	7.36537	0.764193	3.41725	4.37479	3.54823	3.11071	4777.24	256.521	3127.5	30.4855	0.0250741	0.054336	2.1676
53	3-Chloropyridine	0.166355	2-Fluoropyridine-3-boronic acid pincacol ester	0.251325	P1L3 RuPhos OMs	0.00419553	Water	9.2494	Tetrahydrofuran	3.51291	18.5129	99.4	201	0.333	7.36536	0.819321	3.48109	4.35566	3.66503	3.10238	2333.54	185.71	1637.9	32.4953	0.0252203	0.0582557	2.3105
54	3-Chloropyridine	0.166356	2-Fluoropyridine-3-boronic acid pincacol ester	0.251326	P2L1 XPhos Cl	0.00416045	Water	9.24944	Tetrahydrofuran	3.51291	18.5129	70.5	600	0.333	7.3654	0.597982	3.17458	4.36597	3.47116	3.11307	4517.48	1648.44	2314.2	23.9167	0.0250093	0.042518	1.70053
55	3-Chloropyridine	0.166358	2-Fluoropyridine-3-boronic acid pincacol ester	0.25133	P1L1 XPhos OMs	0.00300814	Water	9.24958	Tetrahydrofuran	3.51291	18.5129	110	60	0.333	7.36551	0.763729	3.74353	4.36148	3.48382	3.09897	4543.92	362.222	2972.95	42.2469	0.0180823	0.0543031	3.00386
56	3-Chloropyridine	0.16636	2-Fluoropyridine-3-boronic acid pincacol ester	0.251332	P2L1 XPhos Cl	0.00258973	Water	9.24966	Tetrahydrofuran	3.51291	18.5129	95.2	60	0.333	7.36557	0.57553	3.61038	4.35974	3.46677	3.09741	4814.19	2255.39	2373.61	36.98	0.015567	0.0409216	2.62937
57	3-Chloropyridine	0.166356	2-Fluoropyridine-3-boronic acid pincacol ester	0.251326	P2L1 XPhos Cl	0.00416045	Water	9.24944	Tetrahydrofuran	3.51291	18.5129	102.1	170.9	0.333	7.3654	0.77571	3.43479	4.35901	3.54781	3.1147	4894.46	274.698	3252.54	31.025	0.0250093	0.0551549	2.20596
58	3-Chloropyridine	0.166355	2-Fluoropyridine-3-boronic acid pincacol ester	0.251325	P1L1 XPhos OMs	0.00417121	Water	9.24941	Tetrahydrofuran	3.51291	18.5129	104.6	195.9	0.333	7.36537	0.847326	3.52052	4.36202	3.54772	3.09408	2231.65	157.199	1619.92	33.8019	0.0250741	0.060247	2.4034
59	3-Chloropyridine	0.166355	2-Fluoropyridine-3-boronic acid pincacol ester	0.251325	P1L3 RuPhos OMs	0.00419553	Water	9.2494	Tetrahydrofuran	3.51291	18.5129	108.5	172.5	0.333	7.36536	0.284211	2.42234	4.37049	3.46708	3.09171	1456.83	1623.83	354.705	11.2722	0.0252203	0.0202081	0.801478
60	3-Chloropyridine	0.166355	2-Fluoropyridine-3-boronic acid pincacol ester	0.251325	P1L3 RuPhos OMs	0.00419553	Water	9.2494	Tetrahydrofuran	3.51291	18.5129	110	600	0.333	7.36536	0.733557	3.37053	4.37363	3.66384	3.11232	4336.72	307.392	2725.29	29.0938	0.0252203	0.0521578	2.06864
61	3-Chloropyridine	0.166358	2-Fluoropyridine-3-boronic acid pincacol ester	0.251329	P1L1 XPhos OMs	0.00320868	Water	9.24955	Tetrahydrofuran	3.51291	18.5129	110	597.8	0.333	7.36548	0.742341	3.65059	4.36275	3.55437	3.11841	4275.64	205.902	2719.08	38.4974	0.0192878	0.0527823	2.73726
62	3-Chloropyridine	0.166362	2-Fluoropyridine-3-boronic acid pincacol ester	0.251335	P2L1 XPhos Cl	0.00186802	Water	9.24976	Tetrahydrofuran	3.51291	18.5129	91.2	282.7	0.333	7.36565	0.35675	3.45879	4.36005	3.46914	3.08911	2773.78	2592.86	847.721	31.7786	0.0112287	0.0253658	2.25954
63	3-Chloropyridine	0.166361	2-Fluoropyridine-3-boronic acid pincacol ester	0.251333	P2L1 XPhos Cl	0.00233501	Water	9.2497	Tetrahydrofuran	3.51291	18.5129	95.7	235.8	0.333	7.3656	0.594235	3.7459	4.36381	3.46894	3.10075	4680.69	1982.32	2382.79	42.347	0.0140359	0.0422516	3.01097
64	3-Chloropyridine	0.16636	2-Fluoropyridine-3-boronic acid pincacol ester	0.251332	P1L1 XPhos OMs	0.00248675	Water	9.24966	Tetrahydrofuran	3.51291	18.5129	110	245.1	0.333	7.36557	0.76926	3.94109	4.37417	3.66757	3.11187	4898.81	359.714	3228.36	51.4747	0.014948	0.0546963	3.65998
65	3-Chloropyridine	0.166356	2-Fluoropyridine-3-boronic acid pincacol ester	0.251326	P2L1 XPhos Cl	0.00416045	Water	9.24944	Tetrahydrofuran	3.51291	18.5129	82.6	600	0.333	7.3654	0.716826	3.35585	4.37624	3.47988	3.13016	4621.12	567.731	2837.78	28.6699	0.0250093	0.0509681	2.0385
66	3-Chloropyridine	0.166356	2-Fluoropyridine-3-boronic acid pincacol ester	0.251326	P1L1 XPhos OMs	0.00389048	Water	9.24945	Tetrahydrofuran	3.51291	18.5129	110	600	0.333	7.3654	0.815915	3.55242	4.37207	3.66675	3.11359	4027.3	313.124	2814.99	34.8976	0.0233864	0.0580136	2.48131
67	3-Chloropyridine	0.166355	2-Fluoropyridine-3-boronic acid pincacol ester	0.251325	P1L3 RuPhos OMs	0.00419553	Water	9.2494	Tetrahydrofuran	3.51291	18.5129	97.7	600	0.333	7.36536	0.853492	3.52195	4.37064	3.66654	3.1068	2561.26	196.76	1872.71	33.8505	0.0252203	0.0606854	2.40686
68	3-Chloropyridine	0.166356	2-Fluoropyridine-3-boronic acid pincacol ester	0.251326	P2L1 XPhos Cl	0.00416045	Water	9.24944	Tetrahydrofuran	3.51291	18.5129	90.5	600	0.333	7.3654	0.722247	3.36338	4.37101	3.47119	3.11046	3132.27	495.873	1938.04	28.8867	0.0250093	0.0513536	2.05392
69	3-Chloropyridine	0.166359	2-Fluoropyridine-3-boronic acid pincacol ester	0.25133	P1L1 XPhos OMs	0.00284772	Water	9.2496	Tetrahydrofuran	3.51291	18.5129	110	600	0.333	7.36552	0.784133	3.8247	4.36562	3.55196	3.11615	3960.2	200.966	2660.26	45.8191	0.0171179	0.0557538	3.25785
70	3-Chloropyridine	0.166355	2-Fluoropyridine-3-boronic acid pincacol ester	0.251325	P1L3 RuPhos OMs	0.00419553	Water	9.2494	Tetrahydrofuran	3.51291	18.5129	101.8	600	0.333	7.36536	0.84894	3.51661	4.37269	3.66457	3.10209	2375.7	174.667	1727.77	33.67	0.0252203	0.0603618	2.39402
71	3-Chloropyridine	0.166357	2-Fluoropyridine-3-boronic acid pincacol ester	0.251328	P1L1 XPhos OMs	0.0033691	Water	9.24952	Tetrahydrofuran	3.51291	18.5129	110	159.5	0.333	7.36546	0.773023	3.6423	4.37069	3.55215	3.11286	4595.05	236.44	3042.99	38.1796	0.0202522	0.0549639	2.71467
72	3-Chloropyridine	0.166356	2-Fluoropyridine-3-boronic acid pincacol ester	0.251326	P2L1 XPhos Cl	0.00416045	Water	9.24944	Tetrahydrofuran	3.51291	18.5129	93.1	600	0.333	7.3654	0.743148	3.39191	4.37229	3.55219	3.12052	4399.52	236.194	2800.9	29.7227	0.0250093	0.0528397	2.11336
73	3-Chloropyridine	0.166355	2-Fluoropyridine-3-boronic acid pincacol ester	0.251325	P1L1 XPhos OMs	0.00417121	Water	9.24941	Tetrahydrofuran	3.51291	18.5129	109	600	0.333	7.36537	0.791319	3.45213	4.37102	3.55514	3.11498	3256.7	177.44	2207.73	31.5677	0.0250741	0.0562648	2.24454
74	3-Chloropyridine	0.166356	2-Fluoropyridine-3-boronic acid pincacol ester	0.251326	P2L1 XPhos Cl	0.00416045	Water	9.24944	Tetrahydrofuran	3.51291	18.5129	93.6	600	0.333	7.3654	0.767502	3.42416	4.37378	3.49694	3.12449	4359.9	260.543	2866.64	30.6967	0.0250093	0.0545713	2.18262
75	3-Chloropyridine	0.166356	2-Fluoropyridine-3-boronic acid pincacol ester	0.251326	P2L1 XPhos Cl	0.00416045	Water	9.24944	Tetrahydrofuran	3.51291	18.5129	100.5	235.6	0.333	7.3654	0.722542	3.36379	4.3732	3.47659	3.10944	2987.1	585.041	1848.97	28.8985	0.0250093	0.0513745	2.05476
76	3-Chloropyridine	0.166359	2-Fluoropyridine-3-boronic acid pincacol ester	0.25133	P1L1 XPhos OMs	0.00280761	Water	9.24961	Tetrahydrofuran	3.51291	18.5129	108.1	60	0.333	7.36553	0.785875	3.8411	4.37097	3.55602	3.11511	4796.82	241.342	3229.42	46.5769	0.0168768	0.0558777	3.31173
77	3-Chloropyridine	0.166359	2-Fluoropyridine-3-boronic acid pincacol ester	0.25133	P1L1 XPhos OMs	0.00280761	Water	9.24961	Tetrahydrofuran	3.51291	18.5129	107.7	60	0.333	7.36553	0.804879	3.865	4.36683	3.66872	3.11785	4738.01	254.979	3266.96	47.7032	0.0168768	0.0572289	3.39181
78	3-Chloropyridine	0.166356	2-Fluoropyridine-3-boronic acid pincacol ester	0.251326	P2L1 XPhos Cl	0.00416045	Water	9.24944	Tetrahydrofuran	3.51291	18.5129	93.7	600	0.333	7.3654	0.753315	3.4055	4.36786	3.49051	3.12077	4384.17	308.973	2829.32	30.1293	0.0250093	0.0535626	2.14227
79	3-Chloropyridine	0.166361	2-Fluoropyridine-3-boronic acid pincacol ester	0.251334	P1L1 XPhos OMs	0.00200546	Water	9.24973	Tetrahydrofuran	3.51291	18.5129	102.2	600	0.333	7.36562	0.884548	4.29584	4.36776	3.55239	3.10908	2708.21	160.239	2052.21	73.394	0.0120549	0.0628936	5.2185
80	3-Chloropyridine	0.166361	2-Fluoropyridine-3-boronic acid pincacol ester	0.251334	P1L1 XPhos OMs	0.00200546	Water	9.24973	Tetrahydrofuran	3.51291	18.5129	102.2	600	0.333	7.36562	0.872351	4.28196	4.36765	3.4969	3.10402	2335.46	154.921	1745.35	72.3819	0.0120549	0.0620263	5.14654
81	3-Chloropyridine	0.166364	2-Fluoropyridine-3-boronic acid pincacol ester	0.251338	P1L1 XPhos OMs	0.000842309	Water	9.2499	Tetrahydrofuran	3.51291	18.5129	110	600	0.333	7.36576	0.535725	4.66187	4.38276	3.46828	3.10361	4319.09	2096.74	1982.22	105.834	0.00506304	0.0380914	7.52504
82	3-Chloropyridine	0.166364	2-Fluoropyridine-3-boronic acid pincacol ester	0.251338	P1L1 XPhos OMs	0.000842309	Water	9.2499	Tetrahydrofuran	3.51291	18.5129	110	600	0.333	7.36576	0.492279	4.57729	4.36229	3.46978	3.09871	3931.51	2286.57	1658.01	97.2508	0.00506304	0.0350023	6.91477
83	3-Chloropyridine	0.166356	2-Fluoropyridine-3-boronic acid pincacol ester	0.251326	P2L1 XPhos Cl	0.00416045	Water	9.24944	Tetrahydrofuran	3.51291	18.5129	92.3	600	0.333	7.3654	0.775892	3.43503	4.36666	3.55033	3.11794	4272.22	248.939	2839.7	31.0323	0.0250093	0.0551679	2.20647
84	3-Chloropyridine	0.166362	2-Fluoropyridine-3-boronic acid pincacol ester	0.251335	P1L1 XPhos OMs	0.0017247	Water	9.24977	Tetrahydrofuran	3.51291	18.5129	110	600	0.333	7.36566	0.802972	4.3499	4.3715	3.49013	3.10248	2659.64	224.905	1829.54	77.471	0.0103672	0.0570933	5.50838
85	3-Chloropyridine	0.166362	2-Fluoropyridine-3-boronic acid pincacol ester	0.251335	P1L1 XPhos OMs	0.0017247	Water	9.24977	Tetrahydrofuran	3.51291	18.5129	110	600	0.333	7.36566	0.769433	4.30724	4.37048	3.49058	3.11186	4285.89	287.941	2825.07	74.2351	0.0103672	0.0547086	5.2783
86	3-Chloropyridine	0.166362	2-Fluoropyridine-3-boronic acid pincacol ester	0.251335	P1L1 XPhos OMs	0.0017247	Water	9.24977	Tetrahydrofuran	3.51291	18.5129	110	600	0.333	7.36566	0.765876	4.3026	4.36479	3.49254	3.11351	4358.34	256.639	2859.55	73.892	0.0103672	0.0544557	5.2539
87	3-Chloropyridine	0.166355	2-Fluoropyridine-3-boronic acid pincacol ester	0.251325	P1L1 XPhos OMs	0.00417121	Water	9.24941	Tetrahydrofuran	3.51291	18.5129	77.7	600	0.333	7.36537	0.804725	3.46893	4.37115	3.55064	3.11555	3519.36	199.593	2426.21	32.1025	0.0250741	0.057218	2.28257
88	3-Chloropyridine	0.166355	2-Fluoropyridine-3-boronic acid pincacol ester	0.251325	P1L1 XPhos OMs	0.00417121	Water	9.24941	Tetrahydrofuran	3.51291	18.5129	77.6	600	0.333	7.36537	0.810594	3.4762	4.36546	3.66567	3.11921	4285.9	262.366	2976.2	32.3366	0.0250741	0.0576352	2.29921
89	3-Chloropyridine	0.166355	2-Fluoropyridine-3-boronic acid pincacol ester	0.251325	P1L1 XPhos OMs	0.00417121	Water	9.24941	Tetrahydrofuran	3.51291	18.5129	81.1	600	0.333	7.36537	0.769808	3.42457	4.36468	3.5516	3.12295	5130.01	281.352	3383.13	30.7095	0.0250741	0.0547352	2.18352
90	3-Chloropyridine	0.166361	2-Fluoropyridine-3-boronic acid pincacol ester	0.251333	P1L1 XPhos OMs	0.00216589	Water	9.2497	Tetrahydrofuran	3.51291	18.5129	81	600	0.333	7.3656	0.625075	3.87168	4.36808	3.4712	3.11379	4941.94	1481.74	2646.35	48.0229	0.0130193	0.0444444	3.41455
91	3-Chloropyridine	0.166361	2-Fluoropyridine-3-boronic acid pincacol ester	0.251334	P1L1 XPhos OMs	0.00200546	Water	9.24973	Tetrahydrofuran	3.51291	18.5129	88.8	600	0.333	7.36562	0.678206	4.03022	4.37166	3.46647	3.11281	4830.72	1004.15	2806.67	56.2731	0.0120549	0.0482221	4.00116
92	3-Chloropyridine	0.166361	2-Fluoropyridine-3-boronic acid pincacol ester	0.251334	P1L1 XPhos OMs	0.00188514	Water	9.24974	Tetrahydrofuran	3.51291	18.5129	110	600	0.333	7.36564	0.767147	4.21532	4.36069	3.49029	3.10544	4330.18	252.381	2845.78	67.7156	0.0113316	0.054546	4.81475
93	3-Chloropyridine	0.166361	2-Fluoropyridine-3-boronic acid pincacol ester	0.251334	P1L1 XPhos OMs	0.00188514	Water	9.24974	Tetrahydrofuran	3.51291	18.5129	110	600	0.333	7.36564	0.780083	4.23204	4.36184	3.55031	3.10868	4024.96	202.641	2689.8	68.8575	0.0113316	0.0554658	4.89594
94	3-Chloropyridine	0.166362	2-Fluoropyridine-3-boronic acid pincacol ester	0.251334	P1L1 XPhos OMs	0.00184503	Water	9.24975	Tetrahydrofuran	3.51291	18.5129	110	600	0.333	7.36564	0.793231	4.27026	4.36198	3.54803	3.10841	4063.28	206.442	2761.17	71.5401	0.0110905	0.0564007	5.08668
95	3-Chloropyridine	0.166362	2-Fluoropyridine-3-boronic acid pincacol ester	0.251334	P1L1 XPhos OMs	0.00184503	Water	9.24975	Tetrahydrofuran	3.51291	18.5129	110	600	0.333	7.36564	0.777031	4.24962	4.36734	3.49514	3.11432	4514.14	236.803	3004.91	70.0791	0.0110905	0.0552488	4.9828

## Sheet: MINLP2 optimization
Number	Reagent 1 ID	Reagent 1 Conc. (M)	Reagent 2 ID	Reagent 2 Conc. (M)	Reagent 3 ID	Reagent 3 Conc. (M)	Reagent 4 ID	Reagent 4 Conc. (M)	Make-Up Solvent ID	Inlet Injection (µL)	Outlet Injection (µL)	Temperature (°C)	Residence Time Actual (s)	DBU Conc (M)	Internal Standard Conc. (g/L)	Reaction Yield	Objective Function Value	Naphthalene Retention time in min	3-Chloropyridine Retention time in min	2-Fluoro-3,3'-bipyridine Retention time in min	Naphthalene Peak area in a.u. at 228 nm	3-Chloropyridine Peak area in a.u. at 285 nm	2-Fluoro-3,3'-bipyridine Peak area in a.u. at 285 nm	TON	Reagent 3 Conc in mol%
1	3-Chloropyridine	0.16749	2-Fluoropyridine-3-boronic acid pincacol ester	0.250528	P2L1 XPhos Cl	0.00420587	Water	9.2726	Tetrahydrofuran	3.55262	18.5526	30	504.37	0.333	9.47679	0.0478102	0.643926	4.75682	3.42774	2.14456	1000.7	133.821	151.666	1.90394	0.0251112
2	3-Chloropyridine	0.16749	2-Fluoropyridine-3-boronic acid pincacol ester	0.250528	P1L2 SPhos OMs	0.00216807	Water	9.2726	Tetrahydrofuran	3.55262	18.5526	30	588.377	0.333	9.47679	1e-06	1e-06	4.75729	3.4224	0	760.961	126.524	0	1	0.0129444
3	3-Chloropyridine	0.16749	2-Fluoropyridine-3-boronic acid pincacol ester	0.250528	P1L5 PCy3 OMs	0.00185562	Water	9.2726	Tetrahydrofuran	3.55262	18.5526	30	75.5613	0.333	9.47679	1e-06	1e-06	4.75618	3.53086	0	900.755	104.625	0	1	0.011079
4	3-Chloropyridine	0.16749	2-Fluoropyridine-3-boronic acid pincacol ester	0.250528	P1L7 PtBu3 OMs	0.000846361	Water	9.2726	Tetrahydrofuran	3.55262	18.5526	30	638.451	0.333	9.47679	1e-06	1e-06	4.75741	3.42775	0	820.101	114.904	0	1	0.0050532
5	3-Chloropyridine	0.16749	2-Fluoropyridine-3-boronic acid pincacol ester	0.250528	P1L6 PPh3 OMs	0.00418823	Water	9.2726	Tetrahydrofuran	3.55262	18.5526	30	75.1783	0.333	9.47679	1e-06	1e-06	4.75627	3.52853	0	913.036	104.151	0	1	0.0250058
6	3-Chloropyridine	0.16749	2-Fluoropyridine-3-boronic acid pincacol ester	0.250528	P1L2 SPhos OMs	0.000849647	Water	9.2726	Tetrahydrofuran	3.55262	18.5526	30	210.661	0.333	9.47679	1e-06	1e-06	4.75746	3.47455	0	840.925	115.292	0	1	0.00507282
7	3-Chloropyridine	0.16749	2-Fluoropyridine-3-boronic acid pincacol ester	0.250528	P1L4 XantPhos OMs	0.0042095	Water	9.2726	Tetrahydrofuran	3.55262	18.5526	30	537.576	0.333	9.47679	1e-06	1e-06	4.75797	3.42446	0	955.726	133.529	0	1	0.0251329
8	3-Chloropyridine	0.16749	2-Fluoropyridine-3-boronic acid pincacol ester	0.250528	P1L2 SPhos OMs	0.00418964	Water	9.2726	Tetrahydrofuran	3.55262	18.5526	30	74.1882	0.333	9.47679	1e-06	1e-06	4.75653	3.50406	0	607.349	114.236	0	1	0.0250143
9	3-Chloropyridine	0.16749	2-Fluoropyridine-3-boronic acid pincacol ester	0.250528	P1L1 XPhos OMs	0.000849381	Water	9.2726	Tetrahydrofuran	3.55262	18.5526	30	566.857	0.333	9.47679	0.00254397	-0.689859	4.75712	3.42496	2.23289	1003.71	146.298	8.09441	0.501647	0.00507124
10	3-Chloropyridine	0.16749	2-Fluoropyridine-3-boronic acid pincacol ester	0.250528	P1L5 PCy3 OMs	0.000824721	Water	9.2726	Tetrahydrofuran	3.55262	18.5526	110	603.41	0.333	9.47679	0.0279315	1.73563	4.75533	3.41679	2.18035	959.853	129.905	84.989	5.67251	0.004924
11	3-Chloropyridine	0.16749	2-Fluoropyridine-3-boronic acid pincacol ester	0.250528	P1L1 XPhos OMs	0.000849381	Water	9.2726	Tetrahydrofuran	3.55262	18.5526	110	519.616	0.333	9.47679	0.45953	4.50662	4.75434	3.42187	2.09308	888.68	61.9277	1294.57	90.615	0.00507124
12	3-Chloropyridine	0.16749	2-Fluoropyridine-3-boronic acid pincacol ester	0.250528	P1L4 XantPhos OMs	0.0008419	Water	9.2726	Tetrahydrofuran	3.55262	18.5526	110	71.8831	0.333	9.47679	0.0246856	1.59148	4.75359	0	2.15957	950.074	0	74.3473	4.91102	0.00502657
13	3-Chloropyridine	0.16749	2-Fluoropyridine-3-boronic acid pincacol ester	0.250528	P1L3 RuPhos OMs	0.00420414	Water	9.2726	Tetrahydrofuran	3.55262	18.5526	110	594.861	0.333	9.47679	0.91819	3.5995	4.75321	3.56791	2.21768	866.224	10.0151	2521.31	36.58	0.0251008
14	3-Chloropyridine	0.16749	2-Fluoropyridine-3-boronic acid pincacol ester	0.250528	P1L3 RuPhos OMs	0.000846877	Water	9.2726	Tetrahydrofuran	3.55262	18.5526	110	166.169	0.333	9.47679	0.180271	3.57383	4.7519	3.51096	2.05714	872.613	81.7312	498.668	35.6529	0.00505628
15	3-Chloropyridine	0.16749	2-Fluoropyridine-3-boronic acid pincacol ester	0.250528	P2L1 XPhos Cl	0.000822887	Water	9.2726	Tetrahydrofuran	3.55262	18.5526	30	73.3302	0.333	9.47679	1e-06	1e-06	4.75204	3.51297	0	930.755	109.247	0	1	0.00491305
16	3-Chloropyridine	0.16749	2-Fluoropyridine-3-boronic acid pincacol ester	0.250528	P1L7 PtBu3 OMs	0.00420046	Water	9.2726	Tetrahydrofuran	3.55262	18.5526	30	215.22	0.333	9.47679	1e-06	1e-06	4.75178	3.49688	0	875.531	112.294	0	1	0.0250789
17	3-Chloropyridine	0.16749	2-Fluoropyridine-3-boronic acid pincacol ester	0.250528	P1L6 PPh3 OMs	0.000849785	Water	9.2726	Tetrahydrofuran	3.55262	18.5526	110	569.329	0.333	9.47679	0.0119382	0.85568	4.751	0	2.1322	927.205	0	35.0895	2.35297	0.00507365
18	3-Chloropyridine	0.16749	2-Fluoropyridine-3-boronic acid pincacol ester	0.250528	P1L6 PPh3 OMs	0.000849785	Water	9.2726	Tetrahydrofuran	3.55262	18.5526	30	509.082	0.333	9.47679	1e-06	1e-06	4.75114	3.42066	0	1031.45	149.688	0	1	0.00507365
19	3-Chloropyridine	0.16749	2-Fluoropyridine-3-boronic acid pincacol ester	0.250528	P1L4 XantPhos OMs	0.0042095	Water	9.2726	Tetrahydrofuran	3.55262	18.5526	110	181.022	0.333	9.47679	0.292652	2.45481	4.75238	3.4823	2.01931	849.604	77.1095	788.193	11.6442	0.0251329
20	3-Chloropyridine	0.16749	2-Fluoropyridine-3-boronic acid pincacol ester	0.250528	P1L3 RuPhos OMs	0.00420414	Water	9.2726	Tetrahydrofuran	3.55262	18.5526	62	76.1904	0.333	9.47679	0.0173134	-0.37142	4.75204	3.52522	2.07677	948.757	106.927	52.0717	0.689754	0.0251008
21	3-Chloropyridine	0.16749	2-Fluoropyridine-3-boronic acid pincacol ester	0.250528	P1L1 XPhos OMs	0.00218412	Water	9.2726	Tetrahydrofuran	3.55262	18.5526	110	71.9161	0.333	9.47679	0.742411	4.04186	4.75264	3.50931	2.06435	830.91	17.9491	1955.52	56.932	0.0130403
22	3-Chloropyridine	0.16749	2-Fluoropyridine-3-boronic acid pincacol ester	0.250528	P1L3 RuPhos OMs	0.000846877	Water	9.2726	Tetrahydrofuran	3.55262	18.5526	30	77.5924	0.333	9.47679	1e-06	1e-06	4.75177	3.51802	0	994.133	117.311	0	1	0.00505628
23	3-Chloropyridine	0.16749	2-Fluoropyridine-3-boronic acid pincacol ester	0.250528	P2L1 XPhos Cl	0.00185912	Water	9.2726	Tetrahydrofuran	3.55262	18.5526	62	189.274	0.333	9.47679	0.305586	3.3153	4.75282	3.47824	2.02478	940.401	77.7574	910.984	27.5306	0.0110999
24	3-Chloropyridine	0.16749	2-Fluoropyridine-3-boronic acid pincacol ester	0.250528	P1L6 PPh3 OMs	0.000849785	Water	9.2726	Tetrahydrofuran	3.55262	18.5526	62	77.5324	0.333	9.47679	1e-06	1e-06	4.7546	3.52623	0	958.218	110.25	0	1	0.00507365
25	3-Chloropyridine	0.16749	2-Fluoropyridine-3-boronic acid pincacol ester	0.250528	P2L1 XPhos Cl	0.00420587	Water	9.2726	Tetrahydrofuran	3.55262	18.5526	110	573.935	0.333	9.47679	0.854755	3.5275	4.75526	3.56836	2.19913	1042.36	12.1148	2824.39	34.0388	0.0251112
26	3-Chloropyridine	0.16749	2-Fluoropyridine-3-boronic acid pincacol ester	0.250528	P1L6 PPh3 OMs	0.00418823	Water	9.2726	Tetrahydrofuran	3.55262	18.5526	110	75.9103	0.333	9.47679	0.00388175	-1.86282	4.75458	3.52313	2.04808	945.229	112.11	11.6313	0.155234	0.0250058
27	3-Chloropyridine	0.16749	2-Fluoropyridine-3-boronic acid pincacol ester	0.250528	P1L1 XPhos OMs	0.00418624	Water	9.2726	Tetrahydrofuran	3.55262	18.5526	30	204.31	0.333	9.47679	0.00989067	-0.927042	4.75343	3.47765	2.02099	979.798	129.745	30.7204	0.395722	0.024994
28	3-Chloropyridine	0.16749	2-Fluoropyridine-3-boronic acid pincacol ester	0.250528	P1L4 XantPhos OMs	0.0008419	Water	9.2726	Tetrahydrofuran	3.55262	18.5526	30	205.615	0.333	9.47679	0.00187203	-0.987715	4.75084	0	2.44694	1092.82	0	6.48521	0.372427	0.00502657
29	3-Chloropyridine	0.16749	2-Fluoropyridine-3-boronic acid pincacol ester	0.250528	P1L7 PtBu3 OMs	0.00184945	Water	9.2726	Tetrahydrofuran	3.55262	18.5526	110	622.702	0.333	9.47679	0.33847	3.42271	4.75224	0	2.185	974.839	0	1045.96	30.6524	0.0110422
30	3-Chloropyridine	0.16749	2-Fluoropyridine-3-boronic acid pincacol ester	0.250528	P1L5 PCy3 OMs	0.00421197	Water	9.2726	Tetrahydrofuran	3.55262	18.5526	30	630.172	0.333	9.47679	0.00228624	-2.39785	4.75345	3.40708	2.21827	1044.24	163.959	7.56812	0.0909128	0.0251476
31	3-Chloropyridine	0.16749	2-Fluoropyridine-3-boronic acid pincacol ester	0.250528	P1L7 PtBu3 OMs	0.00184945	Water	9.2726	Tetrahydrofuran	3.55262	18.5526	30	74.9633	0.333	9.47679	1e-06	1e-06	4.75315	3.51906	0	1049.1	125.552	0	1	0.0110422
32	3-Chloropyridine	0.16749	2-Fluoropyridine-3-boronic acid pincacol ester	0.250528	P1L2 SPhos OMs	0.000849647	Water	9.2726	Tetrahydrofuran	3.55262	18.5526	110	71.0031	0.333	9.47679	0.295329	4.06419	4.75516	3.50207	2.03703	1012.28	80.123	947.697	58.2178	0.00507282
33	3-Chloropyridine	0.16749	2-Fluoropyridine-3-boronic acid pincacol ester	0.250528	P1L3 RuPhos OMs	0.00217768	Water	9.2726	Tetrahydrofuran	3.55262	18.5526	30	309.689	0.333	9.47679	1e-06	1e-06	4.75593	3.4093	0	1132.51	165.658	0	1	0.0130019
34	3-Chloropyridine	0.16749	2-Fluoropyridine-3-boronic acid pincacol ester	0.250528	P1L1 XPhos OMs	0.00418624	Water	9.2726	Tetrahydrofuran	3.55262	18.5526	70	646.532	0.333	9.47679	0.852753	3.52984	4.7557	3.40524	2.19769	894.884	36.2864	2419.1	34.1184	0.024994
35	3-Chloropyridine	0.16749	2-Fluoropyridine-3-boronic acid pincacol ester	0.250528	P1L5 PCy3 OMs	0.00421197	Water	9.2726	Tetrahydrofuran	3.55262	18.5526	110	219.749	0.333	9.47679	0.294572	2.46076	4.75455	3.51154	2.05827	1002.52	91.2393	936.155	11.7137	0.0251476
36	3-Chloropyridine	0.16749	2-Fluoropyridine-3-boronic acid pincacol ester	0.250528	P1L2 SPhos OMs	0.00184579	Water	9.2726	Tetrahydrofuran	3.55262	18.5526	110	609.705	0.333	9.47679	0.819713	4.30922	4.75714	3.41278	2.18508	1064.37	20.1859	2765.79	74.3823	0.0110203
37	3-Chloropyridine	0.16749	2-Fluoropyridine-3-boronic acid pincacol ester	0.250528	P1L5 PCy3 OMs	0.00185562	Water	9.2726	Tetrahydrofuran	3.55262	18.5526	110	71.6531	0.333	9.47679	0.0517132	1.54066	4.75685	3.52137	2.02202	1125.21	124.944	184.459	4.66768	0.011079
38	3-Chloropyridine	0.16749	2-Fluoropyridine-3-boronic acid pincacol ester	0.250528	P1L7 PtBu3 OMs	0.00420046	Water	9.2726	Tetrahydrofuran	3.55262	18.5526	110	73.6212	0.333	9.47679	0.508812	3.01005	4.75648	3.52329	2.07373	1040.25	56.3949	1677.87	20.2885	0.0250789
39	3-Chloropyridine	0.16749	2-Fluoropyridine-3-boronic acid pincacol ester	0.250528	P2L1 XPhos Cl	0.000819572	Water	9.2726	Tetrahydrofuran	3.55262	18.5526	110	71.0041	0.333	9.47679	0.416742	4.44461	4.75779	3.61678	2.20318	825.169	7.59048	1090.12	85.1665	0.00489326
40	3-Chloropyridine	0.16749	2-Fluoropyridine-3-boronic acid pincacol ester	0.250528	P1L1 XPhos OMs	0.00418653	Water	9.2726	Tetrahydrofuran	3.55262	18.5526	103.5	234.677	0.333	9.47679	0.806121	3.47353	4.75783	3.41392	2.22587	1102.32	22.5278	2816.91	32.2504	0.0249957
41	3-Chloropyridine	0.16749	2-Fluoropyridine-3-boronic acid pincacol ester	0.250528	P2L1 XPhos Cl	0.00418567	Water	9.2726	Tetrahydrofuran	3.55262	18.5526	89.6	404.383	0.333	9.47679	1.00767	3.6969	4.75657	3.42821	2.08942	933.474	11.7758	2981.85	40.322	0.0249906
42	3-Chloropyridine	0.16749	2-Fluoropyridine-3-boronic acid pincacol ester	0.250528	P1L2 SPhos OMs	0.00418964	Water	9.2726	Tetrahydrofuran	3.55262	18.5526	110	271.622	0.333	9.47679	0.339293	2.60742	4.76443	3.61484	2.20173	2243.78	16.2835	2413.34	13.564	0.0250143
43	3-Chloropyridine	0.16749	2-Fluoropyridine-3-boronic acid pincacol ester	0.250528	P1L3 RuPhos OMs	0.00420414	Water	9.2726	Tetrahydrofuran	3.55262	18.5526	110	273.111	0.333	9.47679	0.79641	3.45721	4.75611	3.6146	2.20909	1173.06	5.68575	2961.56	31.7284	0.0251008
44	3-Chloropyridine	0.16749	2-Fluoropyridine-3-boronic acid pincacol ester	0.250528	P1L4 XantPhos OMs	0.0042095	Water	9.2726	Tetrahydrofuran	3.55262	18.5526	83.2	441.568	0.333	9.47679	0.178635	1.96117	4.75483	3.44264	2.0376	1463.17	167.81	828.561	7.10762	0.0251329
45	3-Chloropyridine	0.16749	2-Fluoropyridine-3-boronic acid pincacol ester	0.250528	P1L5 PCy3 OMs	0.00421197	Water	9.2726	Tetrahydrofuran	3.55262	18.5526	103	322.448	0.333	9.47679	0.432598	2.84505	4.7549	3.44737	2.04979	1308.36	108.167	1794.22	17.2023	0.0251476
46	3-Chloropyridine	0.16749	2-Fluoropyridine-3-boronic acid pincacol ester	0.250528	P1L6 PPh3 OMs	0.00418823	Water	9.2726	Tetrahydrofuran	3.55262	18.5526	110	243.246	0.333	9.47679	0.0348806	0.332821	4.75475	3.50113	2.0216	1262.15	165.214	139.56	1.3949	0.0250058
47	3-Chloropyridine	0.16749	2-Fluoropyridine-3-boronic acid pincacol ester	0.250528	P1L7 PtBu3 OMs	0.00420046	Water	9.2726	Tetrahydrofuran	3.55262	18.5526	110	270.795	0.333	9.47679	0.533484	3.0574	4.75594	3.47903	2.04052	1266.85	57.8134	2142.46	21.2723	0.0250789
48	3-Chloropyridine	0.16749	2-Fluoropyridine-3-boronic acid pincacol ester	0.250528	P1L1 XPhos OMs	0.00181897	Water	9.2726	Tetrahydrofuran	3.55262	18.5526	110	267.337	0.333	9.47679	0.698677	4.16409	4.75609	3.61423	2.19247	1210.69	11.586	2681.48	64.3338	0.0108602
49	3-Chloropyridine	0.16749	2-Fluoropyridine-3-boronic acid pincacol ester	0.250528	P2L1 XPhos Cl	0.00187331	Water	9.2726	Tetrahydrofuran	3.55262	18.5526	108.5	246.408	0.333	9.47679	0.804447	4.27562	4.75484	3.49772	2.05279	1188.79	22.7477	3031.58	71.9245	0.0111846
50	3-Chloropyridine	0.16749	2-Fluoropyridine-3-boronic acid pincacol ester	0.250528	P1L1 XPhos OMs	0.00282951	Water	9.2726	Tetrahydrofuran	3.55262	18.5526	92	615.859	0.333	9.47679	0.812973	3.87376	4.75574	3.40935	2.22652	1192.59	28.1955	3073.49	48.1231	0.0168936
51	3-Chloropyridine	0.16749	2-Fluoropyridine-3-boronic acid pincacol ester	0.250528	P2L1 XPhos Cl	0.00248799	Water	9.2726	Tetrahydrofuran	3.55262	18.5526	85.6	514.636	0.333	9.47679	0.833261	4.02704	4.75574	3.41257	2.08998	1062	21.8502	2805.24	56.0947	0.0148545
52	3-Chloropyridine	0.16749	2-Fluoropyridine-3-boronic acid pincacol ester	0.250528	P2L1 XPhos Cl	0.00418567	Water	9.2726	Tetrahydrofuran	3.55262	18.5526	82	612.252	0.333	9.47679	0.784935	3.4471	4.75588	3.6146	2.20131	1136.56	10.6896	2828.06	31.4092	0.0249906
53	3-Chloropyridine	0.16749	2-Fluoropyridine-3-boronic acid pincacol ester	0.250528	P2L1 XPhos Cl	0.00418567	Water	9.2726	Tetrahydrofuran	3.55262	18.5526	108.2	78.4925	0.333	9.47679	0.76512	3.42153	4.75565	3.42713	2.09206	1132.81	32.4036	2747.59	30.6163	0.0249906
54	3-Chloropyridine	0.16749	2-Fluoropyridine-3-boronic acid pincacol ester	0.250528	P2L1 XPhos Cl	0.00213674	Water	9.2726	Tetrahydrofuran	3.55262	18.5526	103.1	263.641	0.333	9.47679	0.797951	4.13593	4.75595	3.40824	2.19445	1198.24	25.3329	3030.98	62.5479	0.0127574
55	3-Chloropyridine	0.16749	2-Fluoropyridine-3-boronic acid pincacol ester	0.250528	P2L1 XPhos Cl	0.000848843	Water	9.2726	Tetrahydrofuran	3.55262	18.5526	30	509.766	0.333	9.47679	0.00149542	-1.22054	4.75584	3.41676	2.23711	1435.15	221.53	6.80339	0.29507	0.00506802
56	3-Chloropyridine	0.16749	2-Fluoropyridine-3-boronic acid pincacol ester	0.250528	P2L1 XPhos Cl	0.00418567	Water	9.2726	Tetrahydrofuran	3.55262	18.5526	49.8	72.7582	0.333	9.47679	0.0421421	0.522547	4.75503	3.42293	2.05726	1450.06	215.134	193.716	1.68632	0.0249906
57	3-Chloropyridine	0.16749	2-Fluoropyridine-3-boronic acid pincacol ester	0.250528	P2L1 XPhos Cl	0.00289777	Water	9.2726	Tetrahydrofuran	3.55262	18.5526	107.6	153.732	0.333	9.47679	0.777594	3.80543	4.75611	3.41416	2.11012	1252.53	32.7946	3087.5	44.9446	0.0173012
58	3-Chloropyridine	0.16749	2-Fluoropyridine-3-boronic acid pincacol ester	0.250528	P2L1 XPhos Cl	0.00418567	Water	9.2726	Tetrahydrofuran	3.55262	18.5526	107.6	204.422	0.333	9.47679	0.780888	3.44193	4.75556	3.4038	2.15904	1311.03	34.7534	3245.39	31.2473	0.0249906
59	3-Chloropyridine	0.16749	2-Fluoropyridine-3-boronic acid pincacol ester	0.250528	P2L1 XPhos Cl	0.00196112	Water	9.2726	Tetrahydrofuran	3.55262	18.5526	94.6	505.166	0.333	9.47679	0.777115	4.19524	4.75578	3.40174	2.21857	1276.81	38.6092	3145.4	66.3697	0.0117089
60	3-Chloropyridine	0.16749	2-Fluoropyridine-3-boronic acid pincacol ester	0.250528	P2L1 XPhos Cl	0.00403932	Water	9.2726	Tetrahydrofuran	3.55262	18.5526	93.4	610.237	0.333	9.47679	0.846157	3.5578	4.75631	3.41512	2.22821	1202.69	27.0386	3226.04	35.0858	0.0241168

## Sheet: Validation
ELN Experiment	Number	Reagent 1 ID	Reagent 1 Conc. (M)	Reagent 2 ID	Reagent 2 Conc. (M)	Reagent 3 ID	Reagent 3 Conc. (M)	Reagent 4 ID	DBU Conc (M)	Reagent 4 Conc. (M)	Make-Up Solvent ID	Inlet Injection (µL)	Outlet Injection (µL)	Temperature (degC)	Residence Time Actual (s)	Internal Standard Conc. (g/L)	Reaction Yield	Objective Function Value	Naphthalene Retention time in min	3-Chloropyridine Retention time in min	2-Fluoro-3,3'-bipyridine Retention time in min	Naphthalene Peak area in a.u. at 228 nm	3-Chloropyridine Peak area in a.u. at 285 nm	2-Fluoro-3,3'-bipyridine Peak area in a.u. at 285 nm	TON	Reagent 3 Conc in mol%
MINLP 2 TON Opt	1	3-Chloropyridine	0.165853	2-Fluoropyridine-3-boronic acid pincacol ester	0.249758	P2L1 XPhos Cl	0.0021302	Water	0.333	9.23195	Tetrahydrofuran	3.43394	18.4339	96	426.624	9.46034	0.904038	4.254	4.75684	0	2.09759	713.068	0	2027.08	70.3866	0.0128439
MINLP 2 TON Opt	2	3-Chloropyridine	0.165853	2-Fluoropyridine-3-boronic acid pincacol ester	0.249758	P2L1 XPhos Cl	0.0021302	Water	0.333	9.23195	Tetrahydrofuran	3.43394	18.4339	96	427.85	9.46034	0.90277	4.2526	4.75634	0	2.09704	688.417	0	1954.26	70.2878	0.0128439
MINLP 2 TON Opt	3	3-Chloropyridine	0.165853	2-Fluoropyridine-3-boronic acid pincacol ester	0.249758	P2L1 XPhos Cl	0.0021302	Water	0.333	9.23195	Tetrahydrofuran	3.43394	18.4339	96	491.716	9.46034	0.920747	4.27232	4.75491	3.57082	2.1892	808.708	5.14001	2341.45	71.6875	0.0128439
MINLP 2 TON Opt	4	3-Chloropyridine	0.165853	2-Fluoropyridine-3-boronic acid pincacol ester	0.249758	P2L1 XPhos Cl	0.0021302	Water	0.333	9.23195	Tetrahydrofuran	3.43394	18.4339	96	486.856	9.46034	0.907087	4.25737	4.75308	0	2.19591	857.634	0	2446.27	70.624	0.0128439
MINLP 2 TON Opt	5	3-Chloropyridine	0.165853	2-Fluoropyridine-3-boronic acid pincacol ester	0.249758	P2L1 XPhos Cl	0.0021302	Water	0.333	9.23195	Tetrahydrofuran	3.43394	18.4339	96	411.156	9.46034	0.889926	4.23827	4.75246	0	2.09279	881.05	0	2465.51	69.2878	0.0128439
MINLP 2 Yield Opt	6	3-Chloropyridine	0.165853	2-Fluoropyridine-3-boronic acid pincacol ester	0.249758	P2L1 XPhos Cl	0.00414367	Water	0.333	9.23195	Tetrahydrofuran	3.43394	18.4339	94.8	579.339	9.46034	0.893163	3.57653	4.75822	3.57652	2.24367	686.987	5.74652	1929.45	35.7494	0.024984
MINLP 2 Yield Opt	7	3-Chloropyridine	0.165853	2-Fluoropyridine-3-boronic acid pincacol ester	0.249758	P2L1 XPhos Cl	0.00414367	Water	0.333	9.23195	Tetrahydrofuran	3.43394	18.4339	94.8	574.849	9.46034	0.909831	3.59502	4.75642	3.57576	2.24681	691.956	6.65414	1979.67	36.4165	0.024984
MINLP 2 Yield Opt	8	3-Chloropyridine	0.165853	2-Fluoropyridine-3-boronic acid pincacol ester	0.249758	P2L1 XPhos Cl	0.00414367	Water	0.333	9.23195	Tetrahydrofuran	3.43394	18.4339	94.8	508.7	9.46034	0.915855	3.60162	4.75304	3.5688	2.15476	894.356	6.17414	2575.67	36.6576	0.024984
MINLP 2 Yield Opt	9	3-Chloropyridine	0.165853	2-Fluoropyridine-3-boronic acid pincacol ester	0.249758	P2L1 XPhos Cl	0.00414367	Water	0.333	9.23195	Tetrahydrofuran	3.43394	18.4339	94.8	557.47	9.46034	0.926369	3.61304	4.75606	3.57573	2.2389	846.77	8.21404	2466.62	37.0785	0.024984
MINLP 2 Yield Opt	10	3-Chloropyridine	0.165853	2-Fluoropyridine-3-boronic acid pincacol ester	0.249758	P2L1 XPhos Cl	0.00414367	Water	0.333	9.23195	Tetrahydrofuran	3.43394	18.4339	94.8	534.681	9.46034	0.945459	3.63343	4.75649	3.57734	2.23227	845.958	8.34214	2515.04	37.8425	0.024984
MINLP 1 TON Opt	11	3-Chloropyridine	0.165853	2-Fluoropyridine-3-boronic acid pincacol ester	0.249758	P1L1 XPhos OMs	0.0020026	Water	0.333	9.23195	Tetrahydrofuran	3.43394	18.4339	104.4	509.091	9.46034	0.844728	4.24791	4.75657	0	2.10778	744.606	0	1977.87	69.9593	0.0120746
MINLP 1 TON Opt	12	3-Chloropyridine	0.165853	2-Fluoropyridine-3-boronic acid pincacol ester	0.249758	P1L1 XPhos OMs	0.0020026	Water	0.333	9.23195	Tetrahydrofuran	3.43394	18.4339	104.4	581.586	9.46034	0.905199	4.31705	4.75483	0	2.243	946.648	0	2694.54	74.9674	0.0120746
MINLP 1 TON Opt	13	3-Chloropyridine	0.165853	2-Fluoropyridine-3-boronic acid pincacol ester	0.249758	P1L1 XPhos OMs	0.0020026	Water	0.333	9.23195	Tetrahydrofuran	3.43394	18.4339	104.4	612.747	9.46034	0.878913	4.28758	4.75586	0	2.22867	854.883	0	2362.68	72.7904	0.0120746
MINLP 1 TON Opt	14	3-Chloropyridine	0.165853	2-Fluoropyridine-3-boronic acid pincacol ester	0.249758	P1L1 XPhos OMs	0.0020026	Water	0.333	9.23195	Tetrahydrofuran	3.43394	18.4339	104.4	611.237	9.46034	0.872901	4.28072	4.75223	3.60573	2.15308	824.011	10.2128	2261.78	72.2926	0.0120746
MINLP 1 TON Opt	15	3-Chloropyridine	0.165853	2-Fluoropyridine-3-boronic acid pincacol ester	0.249758	P1L1 XPhos OMs	0.0020026	Water	0.333	9.23195	Tetrahydrofuran	3.43394	18.4339	104.4	516.613	9.46034	0.897464	4.30847	4.7558	0	2.14384	890.416	0	2512.83	74.3268	0.0120746
MINLP 1 Yield Opt	16	3-Chloropyridine	0.165853	2-Fluoropyridine-3-boronic acid pincacol ester	0.249758	P1L1 XPhos OMs	0.00380204	Water	0.333	9.23195	Tetrahydrofuran	3.43394	18.4339	94	602.089	9.46034	0.867502	3.63343	4.75758	0	2.25488	740.314	0	2019.48	37.8422	0.0229242
MINLP 1 Yield Opt	17	3-Chloropyridine	0.165853	2-Fluoropyridine-3-boronic acid pincacol ester	0.249758	P1L1 XPhos OMs	0.00380204	Water	0.333	9.23195	Tetrahydrofuran	3.43394	18.4339	94	617.079	9.46034	0.936053	3.70948	4.75605	3.57588	2.2554	876.193	5.53379	2579.01	40.8326	0.0229242
MINLP 1 Yield Opt	18	3-Chloropyridine	0.165853	2-Fluoropyridine-3-boronic acid pincacol ester	0.249758	P1L1 XPhos OMs	0.00380204	Water	0.333	9.23195	Tetrahydrofuran	3.43394	18.4339	94	519.35	9.46034	0.948234	3.72241	4.75376	0	2.15716	841.44	0	2508.95	41.3639	0.0229242
MINLP 1 Yield Opt	19	3-Chloropyridine	0.165853	2-Fluoropyridine-3-boronic acid pincacol ester	0.249758	P1L1 XPhos OMs	0.00380204	Water	0.333	9.23195	Tetrahydrofuran	3.43394	18.4339	94	588.282	9.46034	0.894954	3.66458	4.75095	3.57159	2.22858	878.298	5.50729	2471.7	39.0397	0.0229242
MINLP 1 Yield Opt	20	3-Chloropyridine	0.165853	2-Fluoropyridine-3-boronic acid pincacol ester	0.249758	P1L1 XPhos OMs	0.00380204	Water	0.333	9.23195	Tetrahydrofuran	3.43394	18.4339	94	616.698	9.46034	0.916641	3.68852	4.75525	3.57603	2.24819	826.665	6.34371	2382.77	39.9858	0.0229242

## Sheet: MINLP2 Stock solutions
Reagent Number	Reagent Name	Reagent Conc (M)	ISTD Conc (g/L)
1	3-Chloropyridine	1.43417	81.1474
2	Tetrahydrofuran	0.995989	0
3	2-Fluoropyridine-3-boronic acid pincacol ester	0.995989	0
4	Water	55.4939	0
5	P1L1 XPhos OMs	0.0160699	0
6	P2L1 XPhos Cl	0.0162913	0
7	P1L2 SPhos OMs	0.0163067	0
8	P1L3 RuPhos OMs	0.0168341	0
9	P1L4 XantPhos OMs	0.0161581	0
10	P1L5 PCy3 OMs	0.0163937	0
11	P1L6 PPh3 OMs	0.0168919	0
12	P1L7 PtBu3 OMs	0.0174469	0
Component	Name	Solvent	Molar mass in g/mol	Density in g/ml	Target concentration in M	Target reagent volume in ml	Half reagent volume in ml	Target naphthalene concentration in M	Target naphthalene mass in g	Actual napththalene mass in g	Target reagent mass in g	Actual reagent mass in g	Target total volume in ml	Flask	Actual reagent concentration in M	Actual naphthalene concentration in M	Date	Comment
Reagent A	3-Chloropyridine	THF	113.54	1.194	1.4	0.665645	0.332822	0.634138	0.4064	0.405737	0.79478	0.814181	5	Volumetric flask	1.43417	0.633121	10.3.2017
Reagent B	2-Fluoropyridine-3-boronic acid pincacol ester	THF	223.05	-	1			0	0		1.11525	1.11078	5	Volumetric flask	0.995989	0	10.3.2017
Catalyst	P1L1 Xphos OMs	THF	846.46	-	0.0167			0	0		0.0282718	0.028583	2	Volumetric flask	0.0168838	0	10.3.2017
Base	1,8-Diazabicyclo[5.4.0]undec-7-ene	THF	152.24	1.018	1.666	2.49147	0.830491	0	0		2.53632	2.50476	10	Volumetric flask	1.64527	0	10.3.2017
Catalyst	P2L1 Xphos Cl	THF	786.8	-	0.0167						0.0262791	0.026693	2	Volumetric flask	0.016963	0	10.3.2017
Catalyst	P1L2 SPhos OMs	THF	780.26	-	0.0167						0.0260607	0.025447	2	Volumetric flask	0.0163067	0	10.3.2017
Catalyst	P1L3 RuPhos OMs	THF	836.37	-	0.0167						0.0279348	0.028159	2	Volumetric flask	0.0168341	0	10.3.2017
Catalyst	P1L4 XantPhos OMs	THF	948.35	-	0.0167						0.0316749	0.030647	2	Volumetric flask	0.0161581	0	10.3.2017
Catalyst	P1L5 PCy3 OMs	THF	650.16	-	0.0167						0.0217153	0.021317	2	Volumetric flask	0.0163937	0	10.3.2017
Catalyst	P1L6 PPh3 OMs	THF	632.02	-	0.0167						0.0211095	0.021352	2	Volumetric flask	0.0168919	0	10.3.2017
Catalyst	P1L7 PtBu3 OMs	THF	572.05	-	0.0167						0.0191065	0.019961	2	Volumetric flask	0.0174469	0	10.3.2017
Catalyst	P1L1 XPhos OMs	THF	846.46	-	0.0167			0	0		0.0282718	0.027205	2	Volumetric flask	0.0160699	0	10.4.2017	Replace catalyst stock solution after 14 h
Catalyst	P2L1 XPhos Cl	THF	786.8	-	0.0167						0.0262791	0.025636	2	Volumetric flask	0.0162913	0	10.4.2017	Replace catalyst stock solution after 14 h
