# Supplementary material for: Optimum catalyst selection over continuous and discrete process variables with a single droplet microfluidic reaction platform
Source: Royal Society of Chemistry journal article supplement (doi:10.1039/c8re00032h), 2018-01-01
Supplement: c8re00032h3.xlsx [file c8re00032h3.xlsx]

## Sheet: MINLP 1vs2 N_exp no noise
Algorithm	Test case name new	Original test case name	Yield criterion γ	Mean Number of experiments	Std Number of experiments
MINLP 1	1	1	0.9	83	23
MINLP 1	1	1	0.95	66	6
MINLP 1	1	1	0.98	74	12
MINLP 1	2	2	0.9	116	39
MINLP 1	2	2	0.95	66	6
MINLP 1	3	3	0.9	66	5
MINLP 1	4	3b	0.9	65	6
MINLP 1	5	4	0.9	151	83
MINLP 2	1	1	0.9	50	2
MINLP 2	1	1	0.95	49	2
MINLP 2	1	1	0.98	48	2
MINLP 2	2	2	0.9	50	4
MINLP 2	2	2	0.95	50	3
MINLP 2	3	3	0.9	48	4
MINLP 2	4	3b	0.9	49	3
MINLP 2	5	4	0.9	50	6

## Sheet: MINLP 2 Noise summary
Original test case name	Yield criterion γ	Noise level	Correct catalyst selections	Selections	Mean Number of experiments	Std Number of experiments	Name	Comment
1	0.9	0	10	10/10	50	2	Test case 1 γ = 0.9
1	0.95	0	10	10/10	49	2	Test case 1 γ = 0.95
1	0.98	0	10	10/10	48	2	Test case 1 γ = 0.98
1	0.9	0.005	8	8/10	47	3	Test case 1 γ = 0.9	Second best catalyst
1	0.95	0.005	8	8/10	47	3	Test case 1 γ = 0.95	Second best catalyst
1	0.98	0.005	8	8/10	47	5	Test case 1 γ = 0.98
1	0.9	0.01	10	10/10	47	3	Test case 1 γ = 0.9
1	0.95	0.01	8	8/10	46	2	Test case 1 γ = 0.95	Second best catalyst
1	0.98	0.01	9	9/10	46	4	Test case 1 γ = 0.98
1	0.9	0.02	8	8/10	45	3	Test case 1 γ = 0.9	Second best catalyst
1	0.95	0.02	6	6/10	47	5	Test case 1 γ = 0.95	Second best catalyst
1	0.98	0.02	5	5/10	44	3	Test case 1 γ = 0.98	4x second best catalyst, 1 x third best
2	0.9	0	10	10/10	50	4	Test case 2 γ = 0.9
2	0.95	0	9	9/10	50	3	Test case 2 γ = 0.95	Second best catalyst
2	0.98	0	10	10/10	48	3	Test case 2 γ = 0.98
2	0.9	0.005	8	8/10	50	6	Test case 2 γ = 0.9	Second best catalyst
2	0.95	0.005	10	10/10	48	6	Test case 2 γ = 0.95
2	0.98	0.005	9	9/10	47	3	Test case 2 γ = 0.98	Second best catalyst
2	0.9	0.01	9	9/10	52	6	Test case 2 γ = 0.9	Second best catalyst
2	0.95	0.01	8	8/10	47	3	Test case 2 γ = 0.95	Second best catalyst
2	0.98	0.01	9	9/10	46	2	Test case 2 γ = 0.98	Second best catalyst
2	0.9	0.02	8	8/10	50	4	Test case 2 γ = 0.9	Second best catalyst
2	0.95	0.02	8	8/10	47	4	Test case 2 γ = 0.95	Second best catalyst
2	0.98	0.02	9	9/10	45	3	Test case 2 γ = 0.98	Second best catalyst
3	0.9	0	10	10/10	48	4	Test case 3 γ = 0.9
3	0.95	0	10	10/10	47	3	Test case 3 γ = 0.95
3	0.98	0	10	10/10	48	2	Test case 3 γ = 0.98
3	0.9	0.005	10	10/10	48	4	Test case 3 γ = 0.9
3	0.95	0.005	10	10/10	50	6	Test case 3 γ = 0.95
3	0.98	0.005	10	10/10	46	4	Test case 3 γ = 0.98
3	0.9	0.01	9	9/10	48	3	Test case 3 γ = 0.9
3	0.95	0.01	10	10/10	46	3	Test case 3 γ = 0.95
3	0.98	0.01	10	10/10	47	3	Test case 3 γ = 0.98
3	0.9	0.02	10	10/10	47	4	Test case 3 γ = 0.9
3	0.95	0.02	10	10/10	49	4	Test case 3 γ = 0.95
3	0.98	0.02	10	10/10	48	6	Test case 3 γ = 0.98
4	0.9	0	3	3/10	50	6	Test case 4 γ = 0.9	7 choices of Cat. 2-5 w/TON = 151.8, std = 4.6, yield = 0.878, T = 110 °C, tres = 10.0 min, ccat = 0.967 mM
4	0.9	0.005	3	3/10	49	4	Test case 4 γ = 0.9	7 choices of Cat. 2-5 w/TON = 156.5, std = 7.0, yield = 0.875, T = 110 °C, tres = 10.0 min, ccat = 0.935 mM
4	0.9	0.01	1	1/10	49	5	Test case 4 γ = 0.9	9 choices of Cat. 2-5 w/TON = 153.6, std = 8.4, yield = 0.880, T = 110 °C, tres = 10.0 min, ccat = 0.959 mM
4	0.9	0.02	7	7/10	48	3	Test case 4 γ = 0.9	3 choices of Cat. 2-5 w/TON = 157.9, std = 19, yield = 0.871, T = 110 °C, tres = 10.0 min, ccat = 0.930 mM
3b	0.9	0	10	10/10	49	3	Test case 3b γ = 0.9
3b	0.9	0.005	9	9/10	47	2	Test case 3b γ = 0.9	Second best catalyst
3b	0.9	0.01	10	10/10	47	2	Test case 3b γ = 0.9
3b	0.9	0.02	8	8/10	47	4	Test case 3b γ = 0.9	Best catalyst, but temperature too low

## Sheet: MINLP1 raw data
Test case name new	Yield criterion	Noise level	Exp #	Catalyst	Residence time in min	Temperature in °C	Catalyst concentration in mM	TON	Yield
1	0.9	0	1	1	10	110	0.835	180.7	0.9035
1	0.9	0	2	1	10	110	0.835	180.7	0.9035
1	0.9	0	3	1	10	110	0.835	180.9	0.9045
1	0.9	0	4	1	10	110	0.835	181.7	0.9085
1	0.9	0	5	1	10	110	0.835	180.7	0.9035
1	0.9	0	6	1	10	110	0.835	180.7	0.9035
1	0.9	0	7	1	10	110	0.835	180.7	0.9035
1	0.9	0	8	1	10	110	0.835	180.7	0.9035
1	0.9	0	9	1	10	110	0.835	181.2	0.906
1	0.9	0	10	1	10	110	0.835	180.6	0.903
2	0.9	0	1	1	10	110	0.835	180.8	0.904
2	0.9	0	2	1	10	110	0.835	180.8	0.904
2	0.9	0	3	1	10	110	0.835	180.9	0.9045
2	0.9	0	4	1	10	110	0.835	181.2	0.906
2	0.9	0	5	1	10	110	0.835	180.8	0.904
2	0.9	0	6	1	10	110	0.835	180.7	0.9035
2	0.9	0	7	1	10	110	0.835	181	0.905
2	0.9	0	8	1	10	110	0.835	180.7	0.9035
2	0.9	0	9	1	10	110	0.835	180.9	0.9045
2	0.9	0	10	2	10	110	0.835	180.8	0.904
3	0.9	0	1	1	10	81.7	2.807	32.8	0.551315
3	0.9	0	2	1	10	80.7	2.595	34.9	0.542308
3	0.9	0	3	1	10	79.8	2.592	35.2	0.546338
3	0.9	0	4	1	10	81	2.741	33.6	0.551483
3	0.9	0	5	1	10	81.9	2.903	32.3	0.561478
3	0.9	0	6	1	10	82.4	2.86	32.6	0.558299
3	0.9	0	7	1	10	81.5	2.805	32.9	0.552602
3	0.9	0	8	1	10	81.4	2.806	32.8	0.551119
3	0.9	0	9	1	10	80.4	2.754	33.3	0.549151
3	0.9	0	10	1	10	80.7	2.696	34.3	0.553729
4	0.9	0	1	1	2.3	109.7	2.582	24.3	0.375704
4	0.9	0	2	1	2.5	110	2.701	23.3	0.376846
4	0.9	0	3	1	2.3	110	2.778	22.8	0.379272
4	0.9	0	4	1	2.6	110	2.534	24.7	0.374789
4	0.9	0	5	1	2.4	110	2.569	24.5	0.376889
4	0.9	0	6	1	2.2	110	4.175	16.9	0.4225
4	0.9	0	7	1	2.3	110	2.504	25.1	0.37635
4	0.9	0	8	1	2.4	110	2.58	24.4	0.376958
4	0.9	0	9	1	10	84.8	2.886	21	0.36291
4	0.9	0	10	1	2.3	110	2.579	24.5	0.378356
5	0.9	0	1	1	10	78.6	1.085	142.5	0.925823
5	0.9	0	2	3	10	110	0.938	155.9	0.875654
5	0.9	0	3	2	10	110	0.936	156.2	0.875468
5	0.9	0	4	3	10	110	0.941	155.4	0.875637
5	0.9	0	5	5	10	110	0.939	155.8	0.876025
5	0.9	0	6	1	10	81.1	1.485	104.3	0.927458
5	0.9	0	7	4	10	110	0.944	155.1	0.876733
5	0.9	0	8	2	10	110	0.932	156.8	0.875075
5	0.9	0	9	2	10	110	0.937	156	0.875281
5	0.9	0	10	2	10	110	0.939	155.7	0.875463

## Sheet: MINLP2 raw data 
Test case name new	Yield criterion	Noise level	Exp #	Catalyst	Residence time in min	Temperature in °C	Catalyst concentration in mM	TON	Yield	N_experiments
1	0.9	0	1	1	10	110	0.835	180.783	0.90391	51
1	0.9	0	2	1	10	110	0.835	180.783	0.90391	48
1	0.9	0	3	1	10	110	0.835	180.783	0.90391	52
1	0.9	0	4	1	10	110	0.835	180.783	0.90391	49
1	0.9	0	5	1	10	110	0.835	180.783	0.90391	50
1	0.9	0	6	1	10	110	0.835	180.783	0.90391	51
1	0.9	0	7	1	10	110	0.835	180.783	0.90391	52
1	0.9	0	8	1	10	110	0.835	180.783	0.90391	52
1	0.9	0	9	1	10	110	0.835	180.783	0.90391	49
1	0.9	0	10	1	10	110	0.835	180.783	0.90391	47
1	0.9	0.01	1	1	10	110	0.835	180.675	0.90334	45
1	0.9	0.01	2	1	10	110	0.835	181.635	0.90817	47
1	0.9	0.01	3	1	10	110	0.835	182.09	0.91048	45
1	0.9	0.01	4	1	10	110	0.835	181.599	0.90795	55
1	0.9	0.01	5	1	10	110	0.835	180.026	0.90014	48
1	0.9	0.01	6	1	10	110	0.835	182.09	0.91042	46
1	0.9	0.01	7	1	9.99984	110	0.835	181.671	0.90832	48
1	0.9	0.01	8	1	10	110	0.835	180.693	0.90344	45
1	0.9	0.01	9	1	10	110	0.835	180.062	0.9003	43
1	0.9	0.01	10	1	10	110	0.835	180.657	0.90332	44
1	0.9	0.02	1	3	10	110	1.0132	146.731	0.89025	44
1	0.9	0.02	2	1	10	110	0.84374	178.788	0.90334	47
1	0.9	0.02	3	1	10	110	0.835	181.091	0.90549	48
1	0.9	0.02	4	1	10	107.28	1.911	83.221	0.95232	42
1	0.9	0.02	5	1	10	110	0.86952	173.244	0.90199	46
1	0.9	0.02	6	1	10	110	0.835	181.363	0.90682	43
1	0.9	0.02	7	1	10	110	0.835	178.806	0.89403	44
1	0.9	0.02	8	3	10	110	0.835	180.838	0.90415	44
1	0.9	0.02	9	1	10	110	0.8395	179.433	0.90197	54
1	0.9	0.02	10	1	10	110	0.835	181.89	0.90949	45
1	0.9	0.005	1	1	10	110	0.835	180.729	0.90365	45
1	0.9	0.005	2	1	10	110	0.835	181.145	0.90568	50
1	0.9	0.005	3	3	9.99981	110	0.835	177.861	0.88934	44
1	0.9	0.005	4	1	10	110	0.835	181.417	0.90708	42
1	0.9	0.005	5	1	10	110	0.835	181.581	0.90788	44
1	0.9	0.005	6	2	10	110	0.9166	162.65	0.89271	47
1	0.9	0.005	7	1	10	110	0.835	180.603	0.90298	47
1	0.9	0.005	8	1	10	110	0.835	180.134	0.90068	49
1	0.9	0.005	9	1	10	110	0.835	181.091	0.90548	50
1	0.9	0.005	10	1	10	110	0.835	181.345	0.90673	47
1	0.95	0	1	1	10	110	1.3194	118.593	0.93697	47
1	0.95	0	2	1	9.7134	110	1.6256	97.1931	0.94606	48
1	0.95	0	3	1	9.5505	108.558	1.6573	94.4528	0.93731	48
1	0.95	0	4	1	9.99999	110	1.539	102.678	0.94625	48
1	0.95	0	5	1	10	110	1.3196	118.57	0.93698	48
1	0.95	0	6	1	10	109.228	1.7829	89.0413	0.95058	47
1	0.95	0	7	1	10	110	1.4134	111.208	0.94123	48
1	0.95	0	8	1	9.99968	109.996	1.3223	118.345	0.93708	51
1	0.95	0	9	1	10	110	1.3116	119.247	0.93659	52
1	0.95	0	10	1	10	110	1.2966	120.53	0.93586	53
1	0.95	0.01	1	3	9.9999	110	1.4999	104.815	0.94143	49
1	0.95	0.01	2	1	9.99999	110	1.4736	106.933	0.94356	46
1	0.95	0.01	3	1	10	110	1.4008	112.776	0.94597	46
1	0.95	0.01	4	1	10	110	1.196	131	0.93819	46
1	0.95	0.01	5	1	10	110	1.4726	107.684	0.94951	46
1	0.95	0.01	6	1	10	110	1.6357	97.8759	0.95865	43
1	0.95	0.01	7	1	10	110	1.3828	113.613	0.94078	46
1	0.95	0.01	8	1	10	110	1.1683	134.035	0.93767	46
1	0.95	0.01	9	3	9.99995	110	1.6104	97.339	0.93867	46
1	0.95	0.01	10	1	10	110	0.99278	155.571	0.92482	43
1	0.95	0.02	1	2	10	110	1.7885	88.6681	0.94958	45
1	0.95	0.02	2	1	9.99995	110	1.6637	94.6892	0.94335	40
1	0.95	0.02	3	2	10	110	1.8187	87.988	0.95824	45
1	0.95	0.02	4	1	10	110	1.5559	103.286	0.96225	45
1	0.95	0.02	5	1	9.99993	110	1.3195	120.157	0.94942	55
1	0.95	0.02	6	2	9.99445	109.988	1.2313	126.141	0.93	43
1	0.95	0.02	7	2	10	109.554	1.9145	83.7051	0.95964	48
1	0.95	0.02	8	1	10	110	1.2915	121.973	0.94323	49
1	0.95	0.02	9	1	10	110	1.6035	99.3054	0.95356	46
1	0.95	0.02	10	1	10	110	1.41	112.146	0.94687	54
1	0.95	0.005	1	1	10	110	1.3798	114.069	0.94243	44
1	0.95	0.005	2	1	10	108.307	1.6205	97.1057	0.9423	45
1	0.95	0.005	3	1	10	110	1.3229	117.966	0.93451	47
1	0.95	0.005	4	2	10	110	1.6142	96.902	0.93662	51
1	0.95	0.005	5	1	10	110	1.2205	127.881	0.93462	51
1	0.95	0.005	6	1	10	110	1.5376	103.234	0.9505	47
1	0.95	0.005	7	1	10	107.929	1.8281	86.4529	0.94636	47
1	0.95	0.005	8	1	10	110	1.3208	118.795	0.9395	45
1	0.95	0.005	9	1	10	110	1.8419	86.8168	0.9575	43
1	0.95	0.005	10	3	10	110	1.4341	108.657	0.93311	47
1	0.98	0	1	1	9.99933	109.996	4.174	39.4368	0.98565	52
1	0.98	0	2	1	8.97466	109.103	3.3348	48.5406	0.96931	44
1	0.98	0	3	1	10	110	2.4042	67.2489	0.96811	52
1	0.98	0	4	1	9.9998	109.991	2.2694	71.0583	0.96566	48
1	0.98	0	5	1	10	110	2.4671	65.6016	0.96915	48
1	0.98	0	6	1	10	110	2.4478	66.0955	0.96883	47
1	0.98	0	7	1	9.97789	110	2.2985	70.1896	0.96605	47
1	0.98	0	8	1	10	110	2.3202	69.5746	0.96663	47
1	0.98	0	9	1	9.99038	109.074	2.5127	64.2255	0.96639	49
1	0.98	0	10	1	9.99995	109.991	2.2877	70.5203	0.966	49
1	0.98	0.01	1	1	9.984	110	2.3761	68.0811	0.9687	46
1	0.98	0.01	2	1	10	110	2.6196	61.9917	0.97237	45
1	0.98	0.01	3	1	10	110	2.2406	72.1755	0.96835	45
1	0.98	0.01	4	1	9.99981	109.606	2.3268	69.9513	0.97458	44
1	0.98	0.01	5	1	9.99994	109.995	2.3707	68.7447	0.97587	46
1	0.98	0.01	6	2	10	110	2.5219	63.9691	0.96603	57
1	0.98	0.01	7	2	10	110	3.0384	53.4903	0.97321	46
1	0.98	0.01	8	1	9.62446	108.987	3.288	49.5311	0.97518	43
1	0.98	0.01	9	1	10	110	1.9187	84.0658	0.96583	43
1	0.98	0.01	10	5	10	109.746	2.5576	62.4396	0.95627	43
1	0.98	0.02	1	1	9.9998	109.91	1.848	87.3567	0.96669	43
1	0.98	0.02	2	2	10	110	3.2306	50.2746	0.97258	41
1	0.98	0.02	3	5	10	110	2.6084	62.0723	0.96951	43
1	0.98	0.02	4	2	10	110	2.8653	56.6335	0.97164	43
1	0.98	0.02	5	1	9.70953	110	1.946	83.5964	0.97409	47
1	0.98	0.02	6	2	9.87197	110	3.0685	52.9527	0.973	42
1	0.98	0.02	7	3	9.99995	109.815	1.8006	88.8456	0.9579	48
1	0.98	0.02	8	1	9.68036	110	2.8767	55.768	0.96063	42
1	0.98	0.02	9	3	9.99996	109.999	4.175	39.9648	0.99909	44
1	0.98	0.02	10	1	10	110	2.0463	79.3604	0.97243	49
1	0.98	0.005	1	1	9.99912	110	4.175	39.6068	0.99014	43
1	0.98	0.005	2	1	9.99968	110	2.3031	70.3301	0.96991	58
1	0.98	0.005	3	3	9.99995	110	2.5387	63.3579	0.96316	43
1	0.98	0.005	4	1	10	110	2.3022	70.1896	0.96764	47
1	0.98	0.005	5	1	10	110	2.3292	69.5677	0.97032	49
1	0.98	0.005	6	1	10	110	2.5751	62.9915	0.97128	42
1	0.98	0.005	7	1	10	110	2.3734	68.3677	0.97166	44
1	0.98	0.005	8	2	10	110	2.4509	65.536	0.96175	50
1	0.98	0.005	9	1	9.99881	109.824	2.5759	63.0861	0.97311	48
1	0.98	0.005	10	3	9.99997	110	2.4463	65.4967	0.95946	50
2	0.9	0	1	2	10	110	0.835	180.747	0.90374	52
2	0.9	0	2	1	10	110	0.835	180.747	0.90374	49
2	0.9	0	3	2	10	110	0.835	180.747	0.90374	45
2	0.9	0	4	1	10	110	0.835	180.747	0.90374	57
2	0.9	0	5	1	10	110	0.835	180.747	0.90374	47
2	0.9	0	6	2	10	110	0.835	180.747	0.90374	47
2	0.9	0	7	1	10	110	0.835	180.747	0.90374	53
2	0.9	0	8	1	10	110	0.835	180.747	0.90374	48
2	0.9	0	9	2	10	110	0.835	180.747	0.90374	52
2	0.9	0	10	1	10	110	0.835	180.747	0.90374	52
2	0.9	0.01	1	1	10	110	0.835	182.29	0.91147	63
2	0.9	0.01	2	2	10	110	0.835	182.345	0.91169	50
2	0.9	0.01	3	2	10	110	0.835	182.053	0.91024	49
2	0.9	0.01	4	1	10	110	0.835	181.708	0.9085	50
2	0.9	0.01	5	1	10	110	0.835	179.828	0.8991	61
2	0.9	0.01	6	1	9.99997	110	0.83502	181.508	0.90755	54
2	0.9	0.01	7	2	10	110	0.835	181.999	0.90997	47
2	0.9	0.01	8	2	10	110	0.99789	152.231	0.90968	45
2	0.9	0.01	9	4	10	110	0.835	177.558	0.88776	49
2	0.9	0.01	10	2	10	110	0.835	182.144	0.91075	48
2	0.9	0.02	1	1	10	110	0.835	178.306	0.89153	46
2	0.9	0.02	2	1	10	110	0.835	181.635	0.90817	53
2	0.9	0.02	3	3	10	110	0.90918	165.405	0.90047	50
2	0.9	0.02	4	4	10	110	0.835	178.931	0.89467	43
2	0.9	0.02	5	2	9.9999	110	0.83501	180.603	0.903	51
2	0.9	0.02	6	2	10	110	0.835	183.571	0.91787	56
2	0.9	0.02	7	1	10	110	0.835	183.736	0.91864	47
2	0.9	0.02	8	1	10	110	0.835	179.253	0.8963	49
2	0.9	0.02	9	1	10	110	0.835	184.049	0.92026	46
2	0.9	0.02	10	1	10	110	0.835	184.27	0.92132	55
2	0.9	0.005	1	1	10	110	0.835	181.272	0.9064	47
2	0.9	0.005	2	2	10	110	0.835	180.91	0.90453	53
2	0.9	0.005	3	2	10	110	0.835	180.152	0.90079	56
2	0.9	0.005	4	1	10	110	0.835	180.332	0.90163	48
2	0.9	0.005	5	2	10	110	0.835	181.236	0.9062	47
2	0.9	0.005	6	1	9.99999	110	0.835	181.182	0.9059	55
2	0.9	0.005	7	2	10	110	0.835	180.856	0.9043	44
2	0.9	0.005	8	4	10	110	0.835	177.63	0.88818	46
2	0.9	0.005	9	2	10	110	0.835	181.055	0.90524	61
2	0.9	0.005	10	3	10	110	0.835	178.413	0.89206	44
2	0.95	0	1	1	10	110	1.3041	119.869	0.9361	48
2	0.95	0	2	2	10	110	1.3145	118.985	0.9366	47
2	0.95	0	3	1	10	110	1.9038	83.9902	0.9575	49
2	0.95	0	4	3	9.9999	110	1.6111	97.1834	0.93755	43
2	0.95	0	5	2	10	110	1.5516	101.88	0.9466	47
2	0.95	0	6	2	10	110	1.3004	120.193	0.93591	52
2	0.95	0	7	2	10	110	1.3308	117.637	0.93737	54
2	0.95	0	8	1	10	110	1.3127	119.14	0.93651	55
2	0.95	0	9	2	10	110	1.3051	119.785	0.93615	47
2	0.95	0	10	1	10	110	1.3476	116.257	0.93816	47
2	0.95	0.01	1	1	9.99973	110	1.6672	95.3544	0.9519	45
2	0.95	0.01	2	4	9.99999	110	1.703	93.0652	0.94907	43
2	0.95	0.01	3	1	9.99998	110	1.2895	121.656	0.93935	47
2	0.95	0.01	4	2	9.99997	110	1.6426	97.1737	0.95583	45
2	0.95	0.01	5	2	10	110	1.2919	121.025	0.93626	47
2	0.95	0.01	6	2	10	110	1.4577	108.962	0.95106	53
2	0.95	0.01	7	1	9.99999	109.999	1.4389	109.432	0.94293	52
2	0.95	0.01	8	2	10	110	1.4139	111.687	0.94565	45
2	0.95	0.01	9	3	9.99985	110	1.5129	103.731	0.93973	50
2	0.95	0.01	10	2	9.87495	109.653	2.146	75.2639	0.96711	44
2	0.95	0.02	1	4	10	110	1.5412	101.514	0.93687	55
2	0.95	0.02	2	2	9.99996	110	1.4814	108.04	0.95842	48
2	0.95	0.02	3	1	10	110	1.3441	118.096	0.95055	50
2	0.95	0.02	4	2	10	110	1.1937	131.631	0.94088	44
2	0.95	0.02	5	2	9.99987	110	1.2108	129.788	0.94103	51
2	0.95	0.02	6	1	10	110	1.2134	128.779	0.93567	43
2	0.95	0.02	7	1	9.99989	110	0.9558	160.325	0.91756	43
2	0.95	0.02	8	4	10	110	2.0549	76.1953	0.93754	45
2	0.95	0.02	9	1	10	110	1.339	118.475	0.94992	52
2	0.95	0.02	10	1	10	110	1.3784	116.071	0.95803	43
2	0.95	0.005	1	2	10	110	1.1675	133.527	0.93341	43
2	0.95	0.005	2	1	9.99997	110	1.712	92.9071	0.95247	44
2	0.95	0.005	3	1	10	110	1.6588	95.9858	0.95344	44
2	0.95	0.005	4	1	10	110	1.5753	100.615	0.94906	44
2	0.95	0.005	5	2	10	110	1.4365	109.717	0.94378	44
2	0.95	0.005	6	1	9.99995	110	1.2926	120.796	0.93492	48
2	0.95	0.005	7	1	9.99973	109.999	1.231	126.381	0.93154	45
2	0.95	0.005	8	1	9.99984	109.997	1.4333	109.738	0.94183	58
2	0.95	0.005	9	1	9.99997	110	1.4003	112.708	0.94506	58
2	0.95	0.005	10	2	10	110	1.2976	120.989	0.94011	47
2	0.98	0	1	1	10	110	2.2875	70.5203	0.96594	47
2	0.98	0	2	1	9.57753	110	2.5185	64.0779	0.96636	46
2	0.98	0	3	2	10	110	2.7872	58.3407	0.97369	48
2	0.98	0	4	1	10	110	2.4657	65.6344	0.96904	51
2	0.98	0	5	2	9.99999	109.997	2.4825	65.2092	0.9693	48
2	0.98	0	6	2	10	110	2.389	67.6468	0.96776	44
2	0.98	0	7	2	9.99926	109.256	2.4412	66.069	0.96585	51
2	0.98	0	8	1	9.99965	109.999	2.3175	69.6442	0.96649	51
2	0.98	0	9	1	10	110	2.3478	68.786	0.96704	44
2	0.98	0	10	2	9.99996	110	2.3444	68.8824	0.96698	48
2	0.98	0	1	1	10	110	2.2875	70.5203	0.96594	47
2	0.98	0	2	1	9.57753	110	2.5185	64.0779	0.96636	46
2	0.98	0	3	2	10	110	2.7872	58.3407	0.97369	48
2	0.98	0	4	1	10	110	2.4657	65.6344	0.96904	51
2	0.98	0	5	2	9.99999	109.997	2.4825	65.2092	0.9693	48
2	0.98	0	6	2	10	110	2.389	67.6468	0.96776	44
2	0.98	0	7	2	9.99926	109.256	2.4412	66.069	0.96585	51
2	0.98	0	8	1	9.99965	109.999	2.3175	69.6442	0.96649	51
2	0.98	0	9	1	10	110	2.3478	68.786	0.96704	44
2	0.98	0	10	2	9.99996	110	2.3444	68.8824	0.96698	48
2	0.98	0.01	1	2	10	110	2.6581	61.6517	0.98126	47
2	0.98	0.01	2	2	10	110	4.175	39.7456	0.99367	44
2	0.98	0.01	3	2	10	110	3.9175	42.3048	0.99234	46
2	0.98	0.01	4	2	10	110	2.3543	68.5525	0.96642	45
2	0.98	0.01	5	1	10	110	2.2803	70.6826	0.96516	46
2	0.98	0.01	6	1	10	109.27	2.4851	65.0659	0.96825	45
2	0.98	0.01	7	2	10	110	2.494	64.8904	0.9691	48
2	0.98	0.01	8	1	10	110	2.3319	69.9024	0.97608	48
2	0.98	0.01	9	1	10	110	2.4804	65.8843	0.97853	51
2	0.98	0.01	10	3	10	109.648	2.8148	57.2885	0.96565	43
2	0.98	0.02	1	1	9.99994	110	2.1752	74.6119	0.97179	45
2	0.98	0.02	2	3	10	110	2.3295	68.6829	0.95802	47
2	0.98	0.02	3	2	10	110	2.4064	67.3498	0.97051	44
2	0.98	0.02	4	1	9.82698	110	2.2656	71.7652	0.97356	44
2	0.98	0.02	5	1	9.99695	109.994	1.7641	91.341	0.96489	44
2	0.98	0.02	6	1	10	110	1.565	101.982	0.95565	41
2	0.98	0.02	7	2	10	110	1.7206	93.9629	0.96807	43
2	0.98	0.02	8	2	10	110	1.4869	107.889	0.96066	44
2	0.98	0.02	9	2	10	110	2.1257	76.9226	0.97911	52
2	0.98	0.02	10	2	9.99994	109.999	1.9769	81.3451	0.96294	42
2	0.98	0.005	1	1	9.99996	110	2.4596	65.9238	0.97089	46
2	0.98	0.005	2	1	10	110	2.1961	73.6114	0.96801	45
2	0.98	0.005	3	4	9.99991	110	4.1523	39.3935	0.9795	43
2	0.98	0.005	4	1	9.99998	110	2.268	71.2717	0.96791	50
2	0.98	0.005	5	2	9.99999	110	2.1103	76.4548	0.9661	50
2	0.98	0.005	6	2	10	110	4.175	39.496	0.98738	43
2	0.98	0.005	7	2	10	110	2.2778	70.9801	0.96809	49
2	0.98	0.005	8	2	10	110	2.251	71.8514	0.96848	50
2	0.98	0.005	9	2	9.99998	110	2.4568	66.1285	0.97285	46
2	0.98	0.005	10	1	9.99965	109.999	2.2798	71.0583	0.97001	46
3	0.9	0	1	1	10	82.6438	2.4445	37.1328	0.54355	48
3	0.9	0	2	1	9.99935	80.5722	2.6097	35.3218	0.55201	46
3	0.9	0	3	1	10	81.6382	2.6404	35.0684	0.55445	49
3	0.9	0	4	1	10	81.0767	2.6246	35.2089	0.55334	46
3	0.9	0	5	1	10	81.6992	2.7058	34.429	0.55782	46
3	0.9	0	6	1	10	82.5067	2.561	35.8664	0.55003	45
3	0.9	0	7	1	10	82.0505	2.6745	34.7299	0.5562	57
3	0.9	0	8	1	10	80.1974	2.6726	34.6639	0.55474	45
3	0.9	0	9	1	10	81.1993	2.5877	35.5913	0.55148	48
3	0.9	0	10	1	10	81.658	2.7427	34.0762	0.55967	46
3	0.9	0.01	1	1	10	81.54	2.7649	33.8893	0.5611	43
3	0.9	0.01	2	1	10	80.6785	2.6222	35.2125	0.55293	45
3	0.9	0.01	3	1	9.99997	80.932	2.5385	36.372	0.55285	43
3	0.9	0.01	4	1	10	81.5981	2.5622	36.1581	0.55478	43
3	0.9	0.01	5	1	10	81.009	2.634	35.223	0.55557	46
3	0.9	0.01	6	1	10	81.9064	2.7333	34.46	0.56401	53
3	0.9	0.01	7	1	10	81.7641	2.4638	37.1885	0.54866	47
3	0.9	0.01	8	1	10	82.9127	2.7329	34.3843	0.56268	55
3	0.9	0.01	9	1	10	80.4877	2.8497	33.1784	0.56616	47
3	0.9	0.01	10	1	10	82.8726	2.6033	35.6518	0.55575	47
3	0.9	0.02	1	1	10	80.01	2.7192	34.789	0.56647	46
3	0.9	0.02	2	1	10	85.0568	2.6822	34.9144	0.5608	59
3	0.9	0.02	3	1	10	83.731	2.7899	33.9674	0.56746	46
3	0.9	0.02	4	1	10	79.9873	2.5733	35.913	0.55336	44
3	0.9	0.02	5	1	10	81.1909	2.7969	33.8081	0.56623	51
3	0.9	0.02	6	1	10	83.3527	4.175	24.5276	0.61317	44
3	0.9	0.02	7	1	10	81.0097	2.6747	35.3925	0.56684	52
3	0.9	0.02	8	1	10	83.38	2.4428	37.7845	0.55271	53
3	0.9	0.02	9	1	9.97326	77.6348	2.7908	33.5018	0.55988	43
3	0.9	0.02	10	1	10	81.747	2.8884	32.9009	0.56904	45
3	0.9	0.005	1	1	10	81.4845	2.626	35.3465	0.5558	44
3	0.9	0.005	2	1	10	80.8943	2.6212	35.1984	0.55244	44
3	0.9	0.005	3	1	10	83.6885	2.7723	33.5991	0.55779	52
3	0.9	0.005	4	1	10	80.6681	2.7442	34.0694	0.55986	47
3	0.9	0.005	5	1	10	80.5453	2.7344	34.083	0.55808	47
3	0.9	0.005	6	1	10	76.3012	2.9391	31.5319	0.55493	47
3	0.9	0.005	7	1	10	80.4565	3.1145	30.8859	0.57603	49
3	0.9	0.005	8	1	9.99999	80.2589	2.6117	35.4208	0.55394	52
3	0.9	0.005	9	1	10	81.4852	2.861	32.845	0.5627	46
3	0.9	0.005	10	1	10	81.5596	2.8221	33.2648	0.56215	48
3	0.95	0	1	1	10	81.6923	3.3508	29.2652	0.58721	44
3	0.95	0	2	1	10	81.8867	3.2164	30.1957	0.58158	49
3	0.95	0	3	1	10	80.546	3.2276	30.0782	0.58133	48
3	0.95	0	4	1	10	79.0279	3.1833	30.238	0.57638	53
3	0.95	0	5	1	10	79.9658	4.175	24.6382	0.61596	44
3	0.95	0	6	1	10	80.1644	3.1864	30.3471	0.57902	44
3	0.95	0	7	1	10	81.5541	3.3208	29.4679	0.58596	44
3	0.95	0	8	1	10	79.5633	3.2352	29.9371	0.57997	48
3	0.95	0	9	1	10	81.4219	4.175	24.6925	0.61731	48
3	0.95	0	10	1	10	81.6882	3.1816	30.4474	0.58009	46
3	0.95	0.01	1	1	10	82.8898	3.4529	28.497	0.58919	51
3	0.95	0.01	2	1	10	79.7039	3.8154	26.5466	0.60649	44
3	0.95	0.01	3	1	10	79.3668	3.2114	30.0872	0.57859	43
3	0.95	0.01	4	1	10	86.4217	3.6323	26.859	0.58418	42
3	0.95	0.01	5	1	10	79.7701	3.742	26.8617	0.60192	44
3	0.95	0.01	6	2	10	82.3855	3.3606	27.9579	0.56264	47
3	0.95	0.01	7	1	10	80.4183	3.3187	29.6808	0.5898	48
3	0.95	0.01	8	1	10	79.6316	3.5662	28.0587	0.5992	48
3	0.95	0.01	9	1	10	80.7151	3.5088	28.2474	0.59351	47
3	0.95	0.01	10	1	10	82.5652	3.3714	29.1805	0.58912	49
3	0.95	0.02	1	1	10	80.0182	3.6919	27.5031	0.60803	47
3	0.95	0.02	2	1	10	81.4318	3.3604	29.6511	0.59665	50
3	0.95	0.02	3	1	10	81.8217	3.4985	28.7662	0.60263	46
3	0.95	0.02	4	1	10	79.6407	2.7578	34.1103	0.5633	43
3	0.95	0.02	5	1	10	79.1498	3.2089	30.2774	0.58178	52
3	0.95	0.02	6	1	10	81.0059	3.5669	28.2191	0.60272	43
3	0.95	0.02	7	1	10	82.1081	3.1759	30.9973	0.5895	54
3	0.95	0.02	8	1	10	83.2392	3.0714	31.6235	0.58162	55
3	0.95	0.02	9	1	10	80.9554	3.0913	31.1464	0.57654	48
3	0.95	0.02	10	1	10	80.0652	3.1409	31.2619	0.58797	49
3	0.95	0.005	1	1	9.48761	84.3551	3.6003	27.3824	0.59034	44
3	0.95	0.005	2	1	10	82.5388	3.2976	29.5032	0.58259	45
3	0.95	0.005	3	1	9.99999	79.5746	3.1984	30.2289	0.57895	61
3	0.95	0.005	4	1	10	80.9558	3.3344	29.4649	0.58831	53
3	0.95	0.005	5	1	10	81.1871	3.4217	28.8209	0.59049	56
3	0.95	0.005	6	1	10	80.8201	3.2918	29.7819	0.58702	53
3	0.95	0.005	7	1	10	79.373	3.5957	27.7019	0.59642	46
3	0.95	0.005	8	1	10	80.5668	3.3264	29.4149	0.58593	47
3	0.95	0.005	9	1	10	80.9739	3.6308	27.572	0.59945	46
3	0.95	0.005	10	1	10	82.4177	3.2698	29.9401	0.58625	48
3	0.98	0	1	1	10	81.5543	4.0108	25.4751	0.61184	49
3	0.98	0	2	1	10	79.7868	3.9605	25.654	0.60837	48
3	0.98	0	3	1	10	81.2623	3.6885	27.1805	0.6003	49
3	0.98	0	4	1	10	80.6509	3.9822	25.5976	0.61039	49
3	0.98	0	5	1	10	81.5521	3.9198	25.9326	0.6087	48
3	0.98	0	6	1	10	80.4616	3.9138	25.9352	0.60779	45
3	0.98	0	7	1	10	80.5811	3.6133	27.5885	0.59693	46
3	0.98	0	8	1	10	80.5616	3.6674	27.2758	0.59896	45
3	0.98	0	9	1	10	78.4078	3.4475	28.3662	0.58558	50
3	0.98	0	10	1	10	80.0746	3.871	26.133	0.60574	50
3	0.98	0.01	1	1	10	80.3657	3.9457	25.9637	0.61344	49
3	0.98	0.01	2	1	10	81.6605	4.003	25.4776	0.61072	46
3	0.98	0.01	3	1	10	79.4981	3.6759	27.0774	0.59603	47
3	0.98	0.01	4	1	10	81.2014	3.7877	26.8724	0.6095	46
3	0.98	0.01	5	1	10	80.2176	3.8325	26.4962	0.60808	44
3	0.98	0.01	6	1	10	81.3872	3.8898	25.9222	0.60376	47
3	0.98	0.01	7	1	9.97985	81.7457	3.663	27.5114	0.60343	44
3	0.98	0.01	8	1	10	79.9685	3.5857	27.7518	0.59588	50
3	0.98	0.01	9	1	10	79.7823	3.9415	25.943	0.61232	52
3	0.98	0.01	10	1	10	81.1258	3.8291	26.6157	0.61026	47
3	0.98	0.02	1	1	9.99999	82.411	3.0895	31.4972	0.58272	45
3	0.98	0.02	2	1	10	82.5466	3.7643	26.9639	0.60777	45
3	0.98	0.02	3	1	10	80.4202	3.6541	27.7379	0.60692	46
3	0.98	0.02	4	1	10	80.3794	3.8	26.6157	0.60562	42
3	0.98	0.02	5	1	10	80.7428	3.4382	29.128	0.59968	62
3	0.98	0.02	6	1	10	81.8473	3.775	26.9424	0.609	51
3	0.98	0.02	7	1	10	81.7135	4.175	25.1636	0.6291	43
3	0.98	0.02	8	1	9.99998	81.6266	3.8572	26.3614	0.60885	45
3	0.98	0.02	9	1	10	81.8253	3.7655	27.0476	0.60987	48
3	0.98	0.02	10	1	10	80.4014	3.6244	27.9663	0.60697	48
3	0.98	0.005	1	1	9.99999	82.8769	3.9184	25.8989	0.60765	44
3	0.98	0.005	2	1	10	81.6216	3.7279	27.0395	0.60361	48
3	0.98	0.005	3	1	10	80.1656	3.7594	26.7919	0.60312	46
3	0.98	0.005	4	1	10	81.3075	3.9605	25.6386	0.608	41
3	0.98	0.005	5	1	10	82.1893	4.0028	25.5925	0.61344	44
3	0.98	0.005	6	1	10	79.9005	3.7867	26.4485	0.59972	47
3	0.98	0.005	7	1	10	80.2539	3.702	27.1533	0.60189	45
3	0.98	0.005	8	1	10	82.5156	3.4326	28.7834	0.59165	55
3	0.98	0.005	9	1	10	80.6203	3.7262	27.0747	0.60411	48
3	0.98	0.005	10	1	10	80.1007	3.4416	28.6714	0.5909	44
4	0.9	0	1	1	2.20768	110	2.6578	23.9173	0.38065	51
4	0.9	0	2	1	2.31606	110	2.6554	23.9149	0.38024	53
4	0.9	0	3	1	2.21476	110	2.5934	24.3663	0.37838	53
4	0.9	0	4	1	2.2055	110	2.5757	24.4933	0.37777	46
4	0.9	0	5	1	2.12244	110	2.6501	23.9747	0.38045	47
4	0.9	0	6	1	2.32341	109.189	2.6709	23.7861	0.38042	47
4	0.9	0	7	1	2.11214	110	2.6694	23.8432	0.38111	47
4	0.9	0	8	1	2.00793	110	2.7294	23.4273	0.3829	51
4	0.9	0	9	1	2.54211	110	2.7202	23.3781	0.38081	47
4	0.9	0	10	1	2.176	110	2.8279	22.8214	0.38646	47
4	0.9	0.01	1	1	2.80599	109.856	2.7097	23.3828	0.37941	43
4	0.9	0.01	2	1	2.06771	110	2.8131	22.7895	0.38388	49
4	0.9	0.01	3	1	2.35534	110	2.6616	24.0492	0.3833	48
4	0.9	0.01	4	1	2.00136	110	2.8372	22.8763	0.38867	48
4	0.9	0.01	5	1	2.02042	110	2.7651	23.2127	0.38436	48
4	0.9	0.01	6	1	1.88002	110	3.9852	17.7006	0.42238	47
4	0.9	0.01	7	1	2.06702	110	2.651	24.1383	0.3832	46
4	0.9	0.01	8	1	2.27225	110	2.7376	23.3945	0.38352	43
4	0.9	0.01	9	1	4.62869	93.4815	2.9194	21.6218	0.37797	50
4	0.9	0.01	10	1	2.2929	110	2.7091	23.4788	0.38087	46
4	0.9	0.02	1	1	2.24762	110	2.7118	23.3734	0.37953	48
4	0.9	0.02	2	1	2.48498	110	2.8011	23.1594	0.38847	43
4	0.9	0.02	3	1	2.7278	108.682	2.613	24.1552	0.37793	45
4	0.9	0.02	4	1	2.59988	110	3.6385	18.8818	0.4114	43
4	0.9	0.02	5	1	2.01307	110	2.6313	24.2714	0.38243	45
4	0.9	0.02	6	1	4.91124	86.9512	3.1062	20.2691	0.37701	51
4	0.9	0.02	7	1	2.43028	110	2.7239	23.4366	0.38228	51
4	0.9	0.02	8	1	2.06901	110	3.1041	21.4495	0.39869	46
4	0.9	0.02	9	1	2.47422	110	2.5243	25.2645	0.38187	57
4	0.9	0.02	10	1	2.76943	105.522	2.5322	24.8212	0.37636	44
4	0.9	0.005	1	1	2.42612	109.999	2.6607	23.9508	0.38159	49
4	0.9	0.005	2	1	2.43884	110	2.7993	23.0001	0.38553	46
4	0.9	0.005	3	1	2.47128	110	2.5389	24.7865	0.37683	46
4	0.9	0.005	4	1	2.32858	108.609	2.7178	23.4624	0.38185	48
4	0.9	0.005	5	1	2.26109	110	2.6292	24.0588	0.37877	45
4	0.9	0.005	6	1	2.26843	110	2.6514	24.0203	0.38138	47
4	0.9	0.005	7	1	2.85764	110	2.7705	22.7941	0.37816	47
4	0.9	0.005	8	1	3.00616	107.934	3.0094	21.4323	0.38622	47
4	0.9	0.005	9	1	2.9519	104.922	2.7738	22.9014	0.38038	43
4	0.9	0.005	10	4	2.90484	110	3.944	16.6782	0.3939	51
5	0.9	0	1	5	10	110	1.0025	146.848	0.88157	50
5	0.9	0	2	5	10	110	0.99273	148.146	0.88067	43
5	0.9	0	3	1	10	79.6764	0.835	187.167	0.9358	60
5	0.9	0	4	3	9.99989	109.999	0.93749	155.929	0.87536	51
5	0.9	0	5	1	10	78.9309	0.835	186.215	0.93108	51
5	0.9	0	6	1	10	77.1959	0.97896	158.713	0.9304	48
5	0.9	0	7	2	10	110	1.4716	103.7	0.91377	45
5	0.9	0	8	5	9.9963	110	1.8339	84.6479	0.92957	59
5	0.9	0	9	2	10	110	0.93799	155.867	0.87542	54
5	0.9	0	10	5	10	110	0.98897	148.651	0.88033	43
5	0.9	0.01	1	4	10	110	0.96748	152.201	0.88172	53
5	0.9	0.01	2	5	10	110	0.90509	162.049	0.87829	48
5	0.9	0.01	3	5	10	110	0.9719	151.411	0.88115	43
5	0.9	0.01	4	4	10	110	1.0882	137.51	0.89602	50
5	0.9	0.01	5	3	10	110	0.90603	161.241	0.87481	46
5	0.9	0.01	6	4	10	110	0.90835	161.435	0.8781	48
5	0.9	0.01	7	4	10	110	0.95739	153.178	0.87811	61
5	0.9	0.01	8	5	10	110	0.92898	158.507	0.88169	44
5	0.9	0.01	9	5	10	110	1.0111	144.879	0.87711	52
5	0.9	0.01	10	1	10	79.0682	0.835	184.565	0.92279	47
5	0.9	0.02	1	1	10	84.5737	0.835	178.341	0.89167	47
5	0.9	0.02	2	1	10	79.6929	1.16	137.841	0.95746	45
5	0.9	0.02	3	1	10	81.724	1.0883	142.466	0.92844	48
5	0.9	0.02	4	1	10	82.1277	0.835	187.598	0.93796	47
5	0.9	0.02	5	1	9.89742	79.0608	0.835	189.749	0.94873	52
5	0.9	0.02	6	1	10	78.2186	1.0375	149.276	0.92744	44
5	0.9	0.02	7	1	10	91.9868	1.8847	81.0689	0.91492	46
5	0.9	0.02	8	2	10	110	0.93989	158.222	0.89052	54
5	0.9	0.02	9	1	10	80.0185	0.835	184.472	0.92241	46
5	0.9	0.02	10	5	10	110	0.92943	160.036	0.89065	49
5	0.9	0.005	1	2	8.94911	108.91	1.5808	94.5189	0.89474	53
5	0.9	0.005	2	2	10	110	0.98703	149.172	0.88163	52
5	0.9	0.005	3	1	10	81.0576	0.835	185.323	0.92662	51
5	0.9	0.005	4	2	9.99998	110	0.97435	150.31	0.87695	44
5	0.9	0.005	5	3	10	110	0.91799	159.079	0.87448	56
5	0.9	0.005	6	1	10	77.6743	0.835	184.178	0.92088	54
5	0.9	0.005	7	5	10	110	0.98255	149.486	0.87954	46
5	0.9	0.005	8	5	10	110	1.2911	116.828	0.90318	45
5	0.9	0.005	9	1	8.4651	78.1574	1.1059	138.601	0.91787	46
5	0.9	0.005	10	5	9.99999	110	2.4423	64.6766	0.94587	45
